# Supplementary material
Source: PubMed Central journal article supplement (PMC7865134)
Supplement: pnas.2016198118.sapp.pdf [file pnas.2016198118.sapp.pdf]

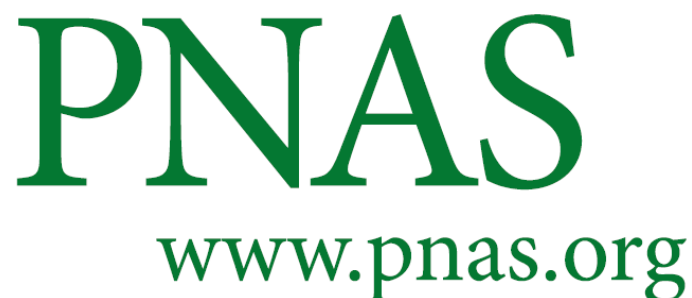

Supplementary Information for:

## **A Glycan FRET Assay for Detection and Characterization of Catalytic Antibodies to the *Cryptococcus neoformans* Capsule**

Conor J Crawford<sup>1,2</sup>, Maggie P. Wear<sup>2</sup>, Daniel F. Q. Smith<sup>2</sup>, Clotilde d'Errico<sup>1</sup>,

Arturo Casadevall<sup>2\*</sup>, Stefan Oscarson<sup>1\*</sup>

<sup>1</sup>Centre for Synthesis and Chemical Biology, University College Dublin, Belfield, Dublin, Ireland,

<sup>2</sup>Department of Molecular Microbiology and Immunology, Johns Hopkins Bloomberg School of Public Health 615 North Wolfe Street, Baltimore, MD 21205, USA

### **ORCID ID**

Conor Crawford [orcid.org/0000-0002-1314-1019](https://orcid.org/0000-0002-1314-1019), Arturo Casadevall [orcid.org/0000-0002-9402-9167](https://orcid.org/0000-0002-9402-9167)

E-mail: [acasade1@jhu.edu](mailto:acasade1@jhu.edu), Stefan Oscarson [orcid.org/0000-0002-8273-4918](https://orcid.org/0000-0002-8273-4918) E-mail: [stefan.oscarson@ucd.ie](mailto:stefan.oscarson@ucd.ie)

Arturo Casadevall, Stefan Oscarson

\*Arturo Casadevall, Stefan Oscarson share senior authorship

**Email:** [stefan.oscarson@ucd.ie](mailto:stefan.oscarson@ucd.ie) and [acasade1@jhu.edu](mailto:acasade1@jhu.edu)

**This PDF file includes:**

Supplementary text

Figures S1 to S10

Tables S1

Compound Characterization

SI References

# Supporting Information

## Table of Contents

|                                                                                                                               |           |
|-------------------------------------------------------------------------------------------------------------------------------|-----------|
| Synthetic methods.....                                                                                                        | 3         |
| Chromatography .....                                                                                                          | 3         |
| Synthetic Materials .....                                                                                                     | 3         |
| Instrumentation .....                                                                                                         | 3         |
| Figure S1. 2H1 mAb and P1 Peptide.....                                                                                        | 4         |
| Figure S2. Mass Spectrometry Spectra of P1 Peptide Post Incubation with mAb 2H1.<br>.....                                     | 5         |
| Figure S3. Fluorescence Spectrum of Oigosaccharide FRET Probe.....                                                            | 6         |
| Figure S4. The FRET and FRET-OAc Probes are Hydrolysed Following Michaelis-<br>Menten Kinetics.....                           | 7         |
| Table S1. Supplemental Michaelis-Menten Kinetics Data. <sup>a</sup> .....                                                     | 8         |
| Figure S5. Effect of Acetylation on GXM Conformation. ....                                                                    | 9         |
| Figure S6. Docking Results of Acetylated GXM Decasaccharide with 2H1.....                                                     | 10        |
| Figure S7. Fluorescent Microscopy of Heat-Killed <i>C. neoformans</i> cells Incubated<br>Catalytic Antibodies Over Time. .... | 11        |
| Figure S8. Fluorescent Microscopy of Heat-Killed <i>C. neoformans</i> Cells Incubated<br>Catalytic Antibodies on Day 3.....   | 12        |
| Figure S9. Mass Spectrum of 18B7 and Decasaccharide Incubation.....                                                           | 13        |
| Figure S10. Mass Spectrum of 2H1 mAb and Decasaccharide Suggests Lyase<br>Activity.....                                       | 14        |
| <b><i>NMR Nomenclature</i></b> .....                                                                                          | <b>15</b> |
| <b><i>Modeling Data</i></b> .....                                                                                             | <b>22</b> |
| <b><i>NMR Spectra</i></b> .....                                                                                               | <b>36</b> |

## General methods

### Synthetic methods

Unless otherwise noted all reactions containing air- and moisture-sensitive reagents were carried out under an inert atmosphere of nitrogen in oven-dried glassware with magnetic stirring. N<sub>2</sub>-flushed stainless cannulas or plastic syringes were used to transfer air- and moisture-sensitive reagents. All reactions were monitored by thin-layer chromatography (TLC) on Merck DC-Alufolien plates precoated with silica gel 60 F254. Visualization was performed with UV-light (254 nm) fluorescence quenching. Evaporation in vacuo/under vacuum refers to the removal at 40 °C, unless otherwise stated, of volatiles on a Buchi rotary evaporator with an integrated vacuum pump.

### Chromatography

Silica gel flash chromatography was carried out using Davisil LC60A (40-63 μm) silica gel or with automated flash chromatography systems, Buchi Reveleris® X2 (UV 200-500 nm and ELSD detection, Reveleris® silica cartridges 40 μm, BÜCHI Labortechnik AG) and Biotage® SP4 HPFC (UV 200-500 nm, Biotage® SNAP KP-Sil 50 μm irregular silica, Biotage AB).

### Synthetic Materials

All chemicals for the synthesis were purchased from commercial suppliers (Acros, Carbosynth Ltd, Fisher Scientific Ltd, Glycom A/S, Merck, Sigma-Aldrich, VWR, STREM Chemicals) and used without purification. Dry DCM and THF were obtained from a PureSolv-ENTM solvent purification system (Innovative Technology Inc.). All other anhydrous solvents were used as purchased from Sigma-Aldrich in AcroSeal® bottles.

### Instrumentation

<sup>1</sup>H NMR (400, 500 or 600 MHz), <sup>13</sup>C NMR (101 MHz or 125 MHz) spectra were recorded on Varian-inova at 25 °C in chloroform-d<sub>1</sub> (CDCl<sub>3</sub>), methanol-d<sub>4</sub> (CD<sub>3</sub>OD), water-d<sub>2</sub> (D<sub>2</sub>O), <sup>1</sup>H NMR spectra were standardized against the residual solvent peak (CDCl<sub>3</sub>, δ = 7.26 ppm; CD<sub>3</sub>OD, δ = 3.31 ppm; D<sub>2</sub>O, δ = 4.79 ppm; d<sub>6</sub>-DSS δ = 0.0 ppm or internal tetramethylsilane, δ = 0.00 ppm). Bruker instrumentation spectrometers were equipped with Avance II console and triple resonance, TCI cryogenic probe with z-axis pulsed field. <sup>13</sup>C NMR spectra were standardized against the residual solvent peak (CDCl<sub>3</sub>, δ = 77.16 ppm; CD<sub>3</sub>OD, δ = 49.00 ppm. All <sup>13</sup>C NMR are <sup>1</sup>H decoupled. All NMR data is represented as follows: chemical shift (δ ppm), multiplicity (s = singlet, d = doublet, t = triplet, q = quartet, dd = doublet of doublets, ddd = doublet of doublets of doublets, dt = doublet of triplets, m = multiplet, br = broad signal, ad = apparent doublet, at = apparent triplet), coupling constant in Hz, integration. Assignments were aided by homonuclear <sup>1</sup>H-<sup>1</sup>H (COSY, TOCSY), and <sup>1</sup>H-<sup>13</sup>C heteronuclear (HSQC, HMBC) two-dimensional correlation spectroscopies. <sup>13</sup>C chemical shifts were reported with one digit after the decimal point, unless an additional digit was reported to distinguish overlapping peaks. Software for data processing: MestReNova, version 11.0.0-17609 (MestReLab Research S.L.). High-resolution mass spectrometry (HRMS) data were recorded on a Waters micromass LCT LC-Tof instrument using electrospray ionization (ESI) in either positive or negative mode. Low-resolution mass spectrometry (LRMS) experiments were recorded on a Waters micromass Quattro Micro LC-MS/MS instrument using electrospray ionization (ESI) in either positive or negative mode.

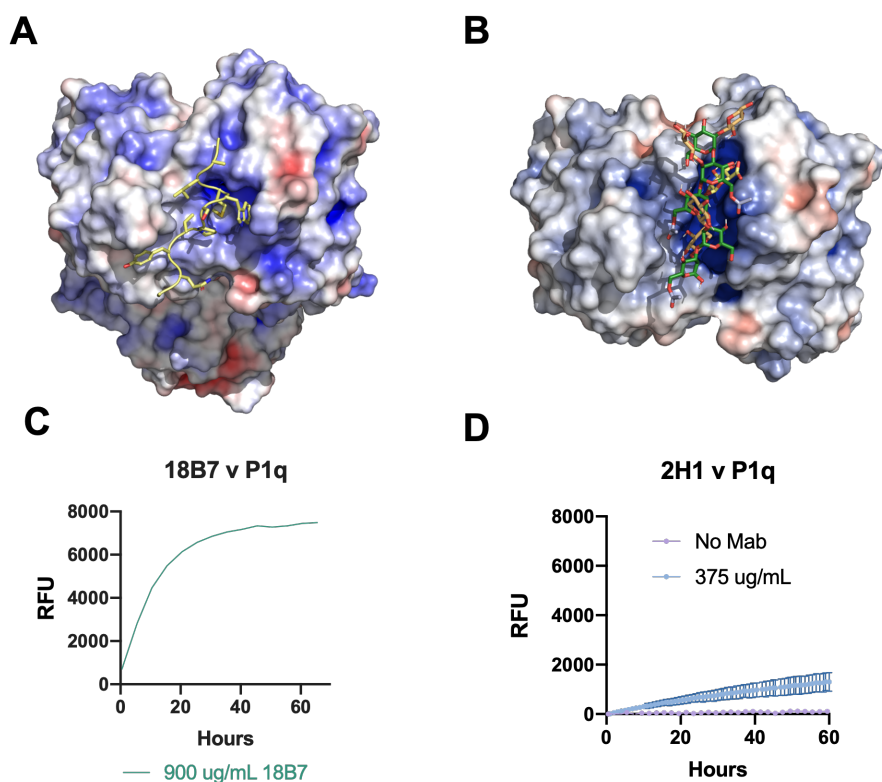

**Figure S1. 2H1 mAb and P1 Peptide.** **A** Known crystal structure of 2H1 mAb with P1 peptide (shown in green) in binding site. Calculated electrostatic surface potential of 2H1 mAb was complete using adaptive Poisson-Boltzmann solve (APBS) in PyMOL (+10 kT to -10 kT). Electrostatic surface potentials are colored red for negative charges, blue for positive charges, and white color represents neutral residues. **B** Modelling interactions between 2H1 and its deca-saccharide substrate. Molecular model of known crystal structure of anti-GXM Mab 2H1. **C** Monoclonal antibody 18B7's catalytic activity against the P1q FRET peptide. **D** Monoclonal antibody 2H1 has catalytic activity against the P1q FRET peptide. The P1q FRET probe (200  $\mu$ M) was incubated with 375  $\mu$ g/mL of 2H1 or alone (No Mab). All measurements were performed at 37  $^{\circ}$ C with an excitation wavelength of 320 nm, an emission wavelength of 405 nm, and an emission cut-off filter of 325 nm. Change in fluorescence at 405 nm indicated hydrolysis of the FRET probe. Incubations were set up in triplicate, with error bars shown.

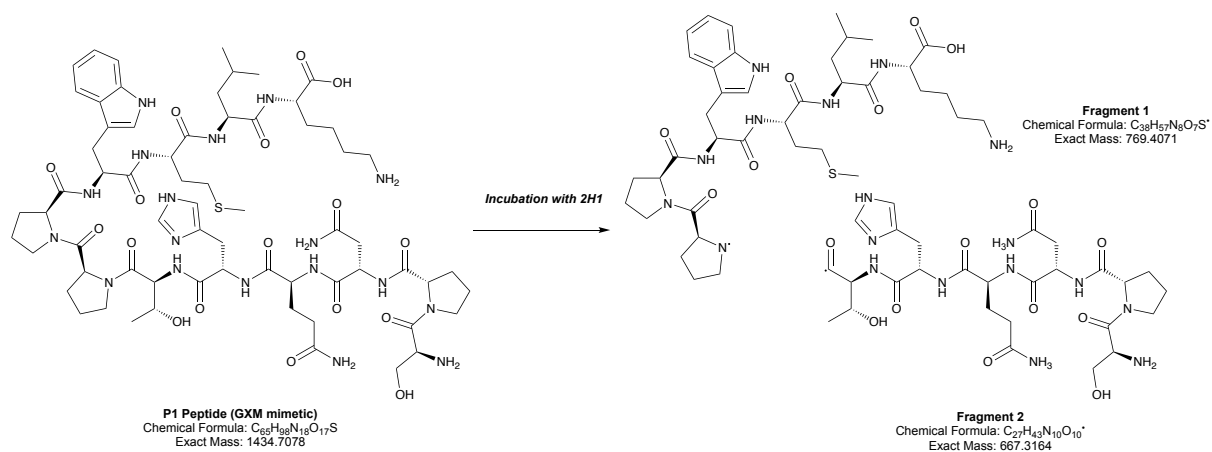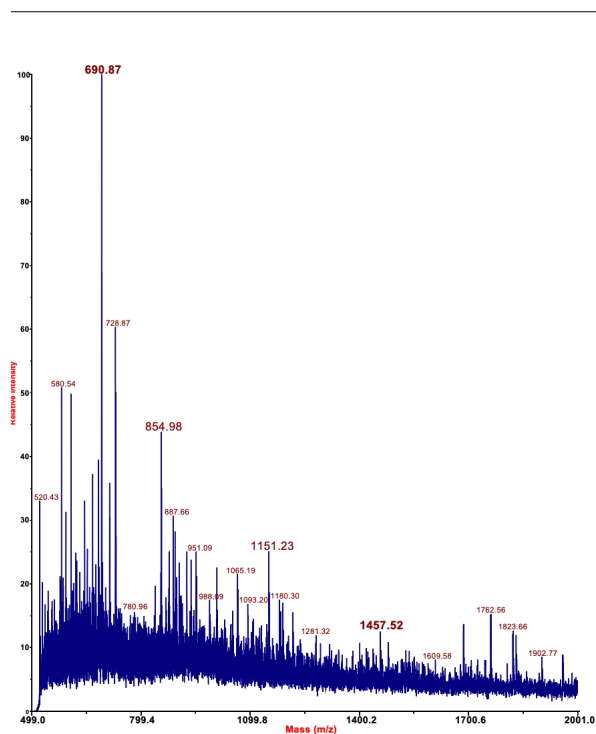

**Figure S2. Mass Spectrometry Spectra of P1 Peptide Post Incubation with mAb 2H1. Fragment 1 769  $m/z$  is in noise, while fragment 2 [+Na] is seen as 690  $m/z$ .**

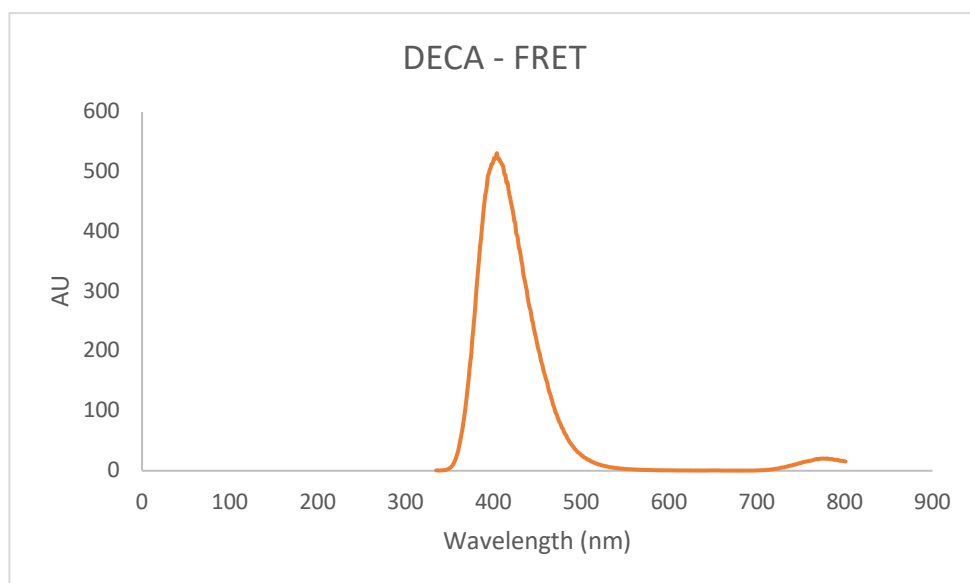

**Figure S3. Fluorescence Spectrum of Oigosaccharide FRET Probe.** Excitation at 325 nm, Fluorescence at 410 nm.

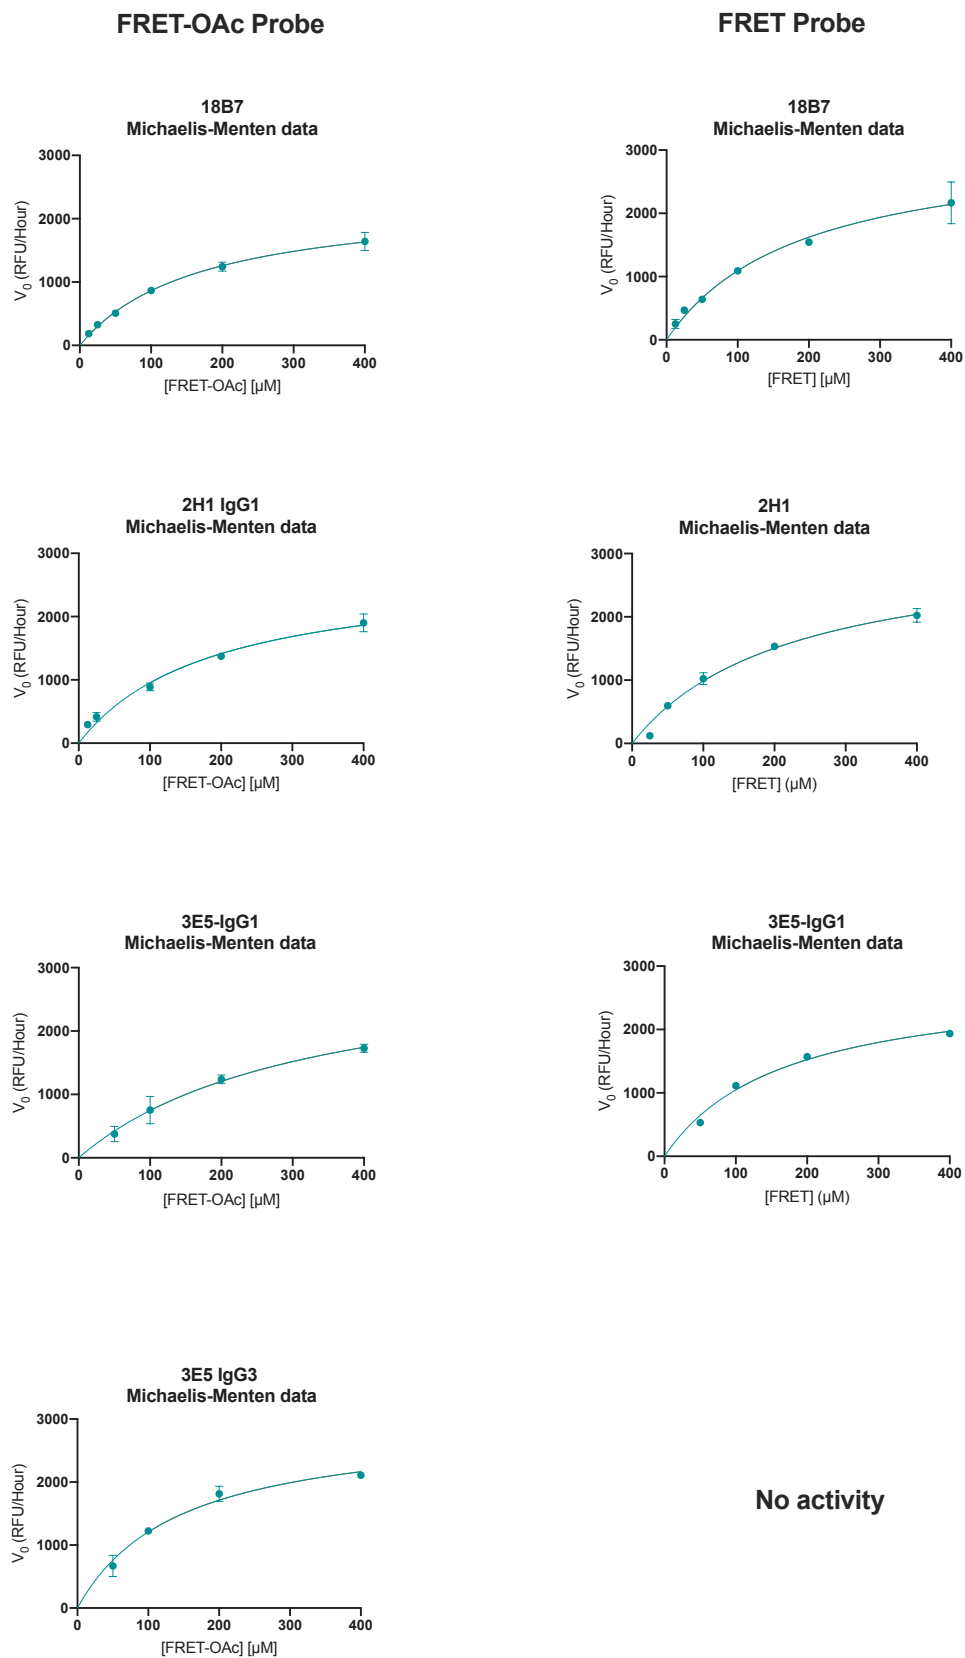

**Figure S4. The FRET and FRET-OAc Probes are Hydrolyzed Following Michaelis-Menten Kinetics.** FRET probes 17 and 16 was incubated at varying micromolar concentrations. It was not possible to determine the catalytic activity of 3E5-IgG3 towards FRET probe 17. The initial velocity ( $V_0$ ) of each reaction was

determined and plotted as a function of substrate concentration, the data was fit to the Michaelis-Menten equation for a single-step bimolecular reaction using nonlinear regression.  $K_m$  and  $k_{cat}$  were calculated using Prism 8. Each point represents  $n = 3$  and bars represent the mean  $\pm$ SD.

**Table S1. Supplemental Michaelis-Menten Kinetics Data.<sup>a</sup>**

| Entry | Antibody             | FRET Probe      | $K_m$ [ $\mu$ M] 95% CI          | $k_{cat}$ [ $s^{-1}$ ] 95% CI   |
|-------|----------------------|-----------------|----------------------------------|---------------------------------|
| 1     | 18B7                 | <b>FRET</b>     | 30.0 - 102.4<br>$\times 10^{-3}$ | 26.0 - 45.5<br>$\times 10^{-3}$ |
| 2     | 2H1                  | <b>FRET</b>     | 36.1 - 113.1<br>$\times 10^{-3}$ | 35.9 - 62.5<br>$\times 10^{-3}$ |
| 3     | 3E5-IgG <sub>1</sub> | <b>FRET</b>     | 16.0 - 158.5<br>$\times 10^{-3}$ | 19.5 - 56.1<br>$\times 10^{-3}$ |
| 4     | 3E5-IgG <sub>3</sub> | <b>FRET</b>     | ND                               | ND                              |
| 5     | 18B7                 | <b>FRET-OAc</b> | 36.4 - 61.1<br>$\times 10^{-3}$  | 21.6 - 27.4<br>$\times 10^{-3}$ |
| 6     | 2H1                  | <b>FRET-OAc</b> | 30.8 - 91.5<br>$\times 10^{-3}$  | 31.7 - 51.9<br>$\times 10^{-3}$ |
| 7     | 3E5-IgG <sub>1</sub> | <b>FRET-OAc</b> | 48.2 - 196.4<br>$\times 10^{-3}$ | 19.5 - 56.1<br>$\times 10^{-3}$ |
| 8     | 3E5-IgG <sub>3</sub> | <b>FRET-OAc</b> | 25.7 - 62.6<br>$\times 10^{-3}$  | 25.8 - 37.5<br>$\times 10^{-3}$ |

<sup>a</sup> The initial velocity ( $V_0$ ) of each reaction was determined and plotted as a function of substrate concentration, the data was fit to the Michaelis-Menten equation for a single-step bimolecular reaction using nonlinear regression.  $K_m$  and  $k_{cat}$  were calculated using Prism 8. Each experiment was repeated in triplicate.



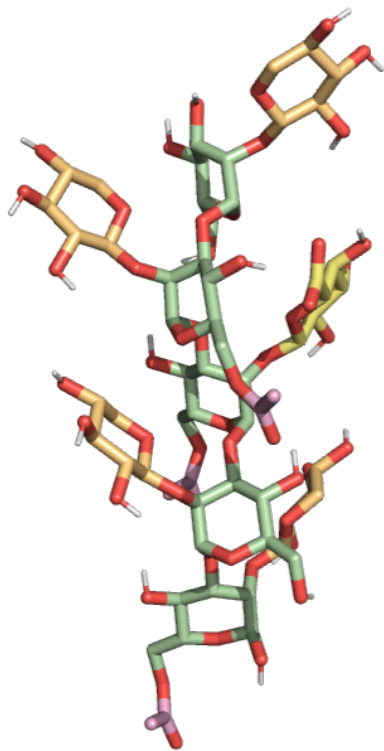

GXM-6-O-Acetylation

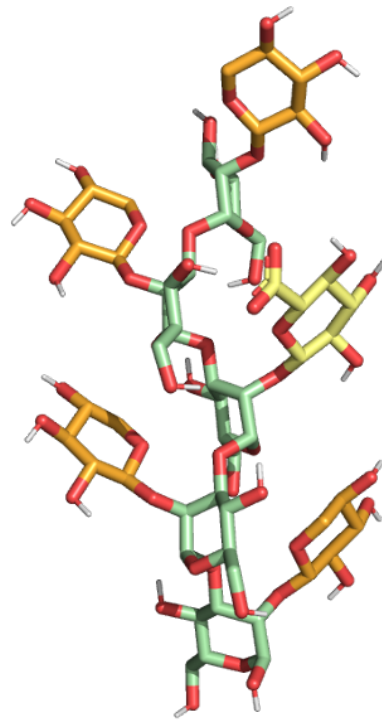

GXM

**Figure S5. Effect of Acetylation on GXM Conformation.** GLYCAM carbohydrate builder was used to predict conformation of acetylated and deacetylated GXM.(37–39) Mannan backbone is decorated with xylose and glucuronic substituents acid facing outwards from helical conformation. Acetylation does not cause change in conformation but creates new epitopes.

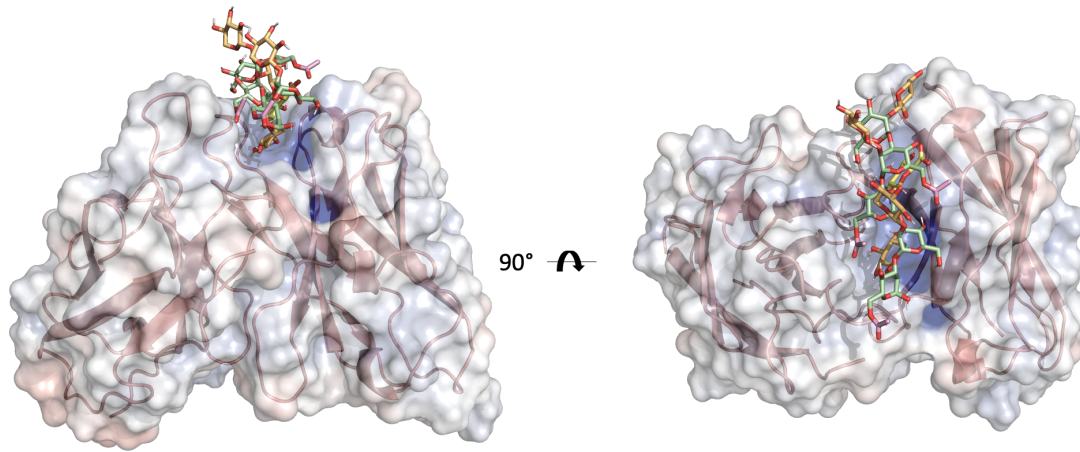

**Figure S6. Docking Results of Acetylated GXM Decasaccharide with 2H1.**

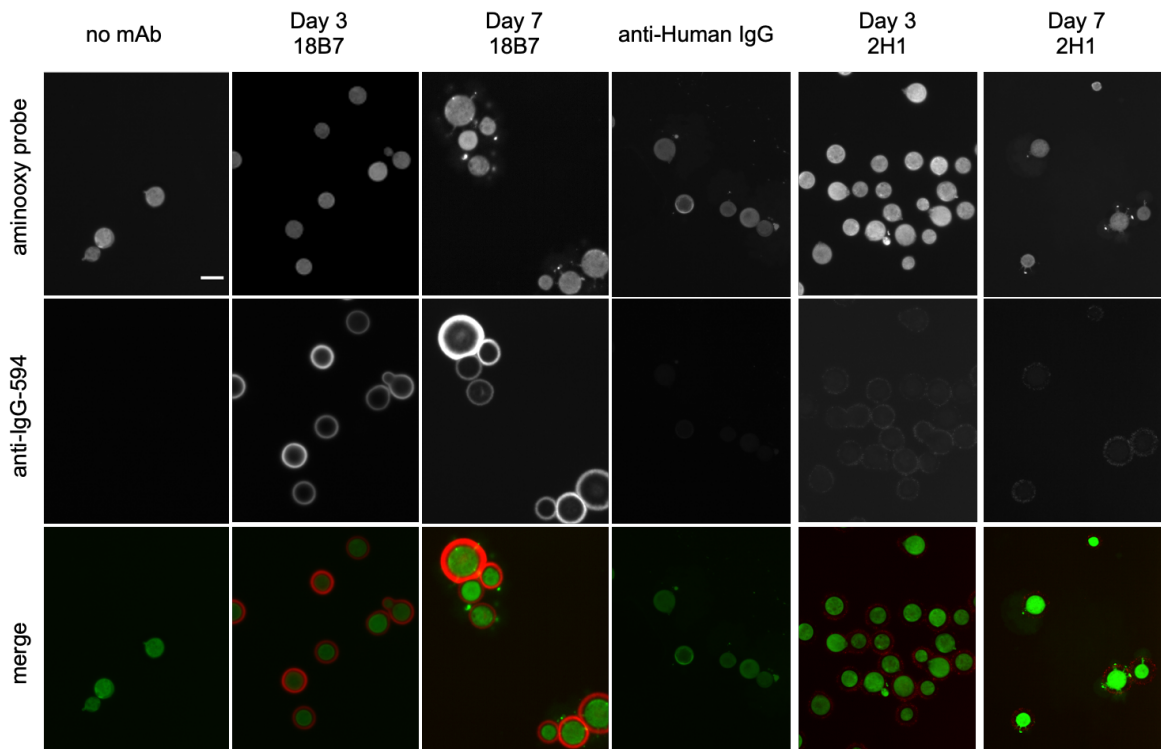

**Figure S7. Fluorescent Microscopy of Heat-Killed *C. neoformans* cells Incubated Catalytic Antibodies Over Time.** Heat-killed cells were incubated with 18B7, 2H1, anti-human IgG or no antibody (no mAb) and imaged on day 3 and 7. An aminoxy probe was used to visualize the change in capsule architecture after exposure to catalytic antibodies over time. Scale bar 5  $\mu$ m.

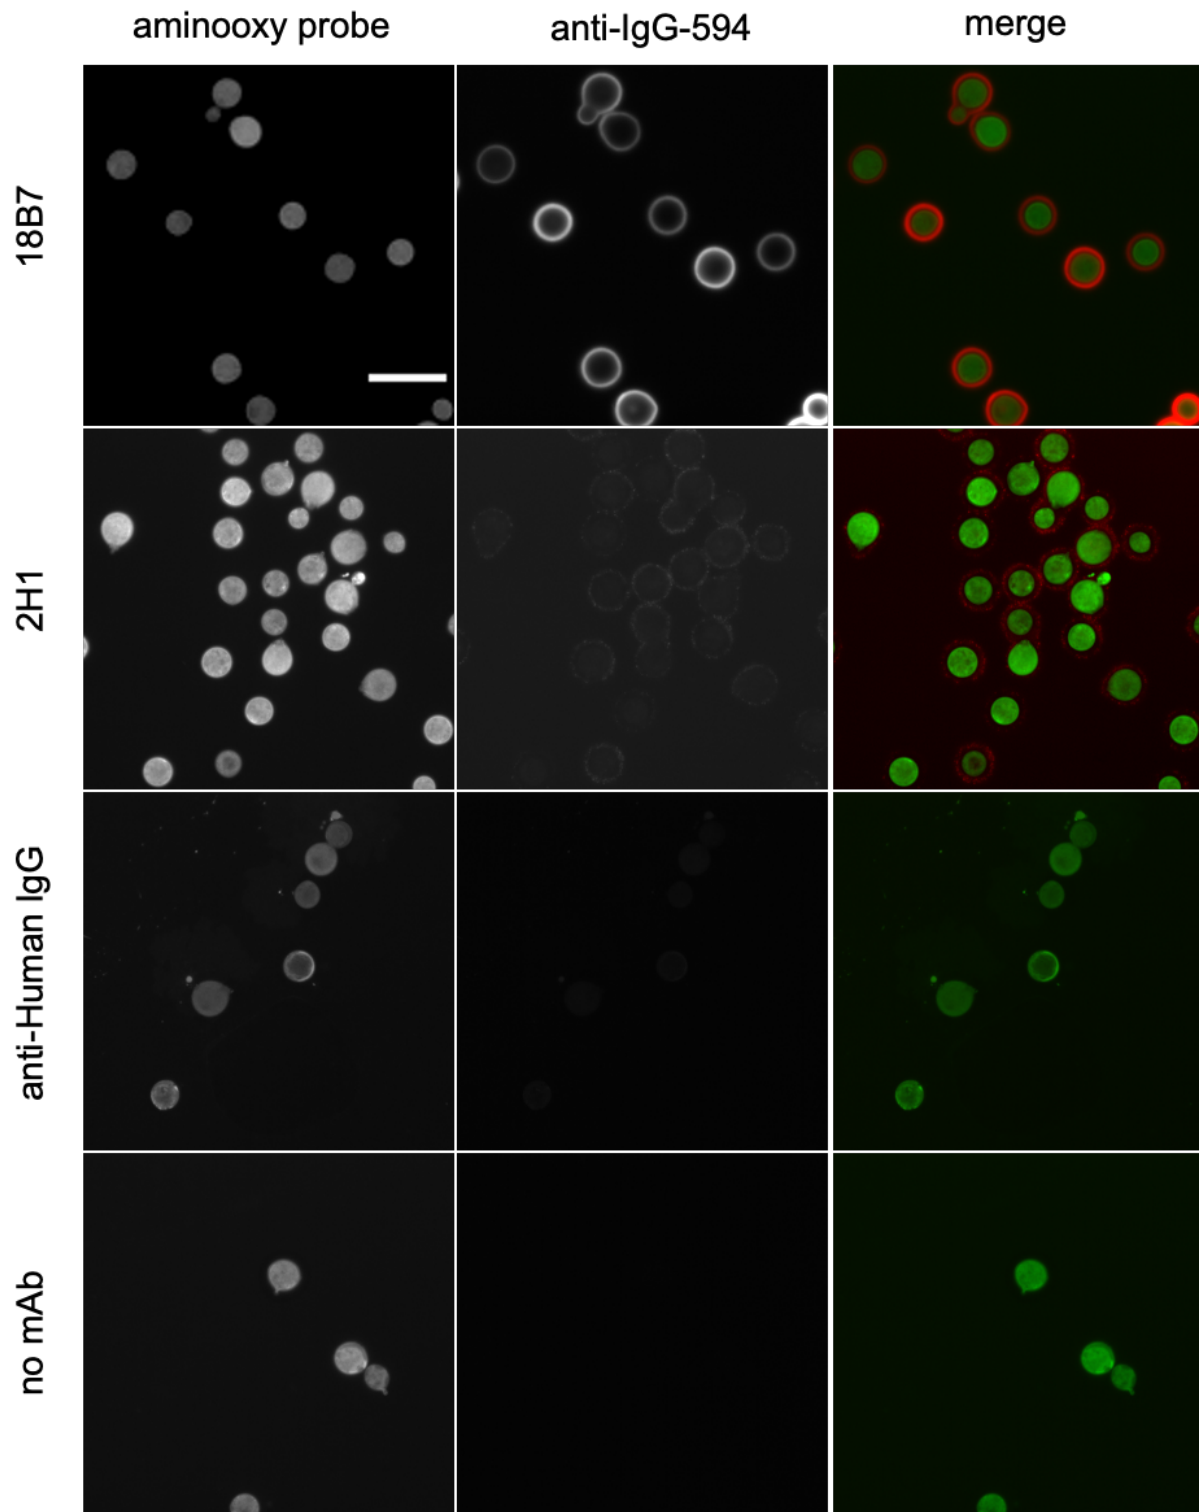

**Figure S8. Fluorescent Microscopy of Heat-Killed *C. neoformans* Cells Incubated Catalytic Antibodies on Day 3. Scale 5  $\mu$ m.**

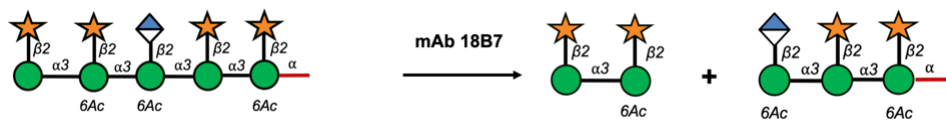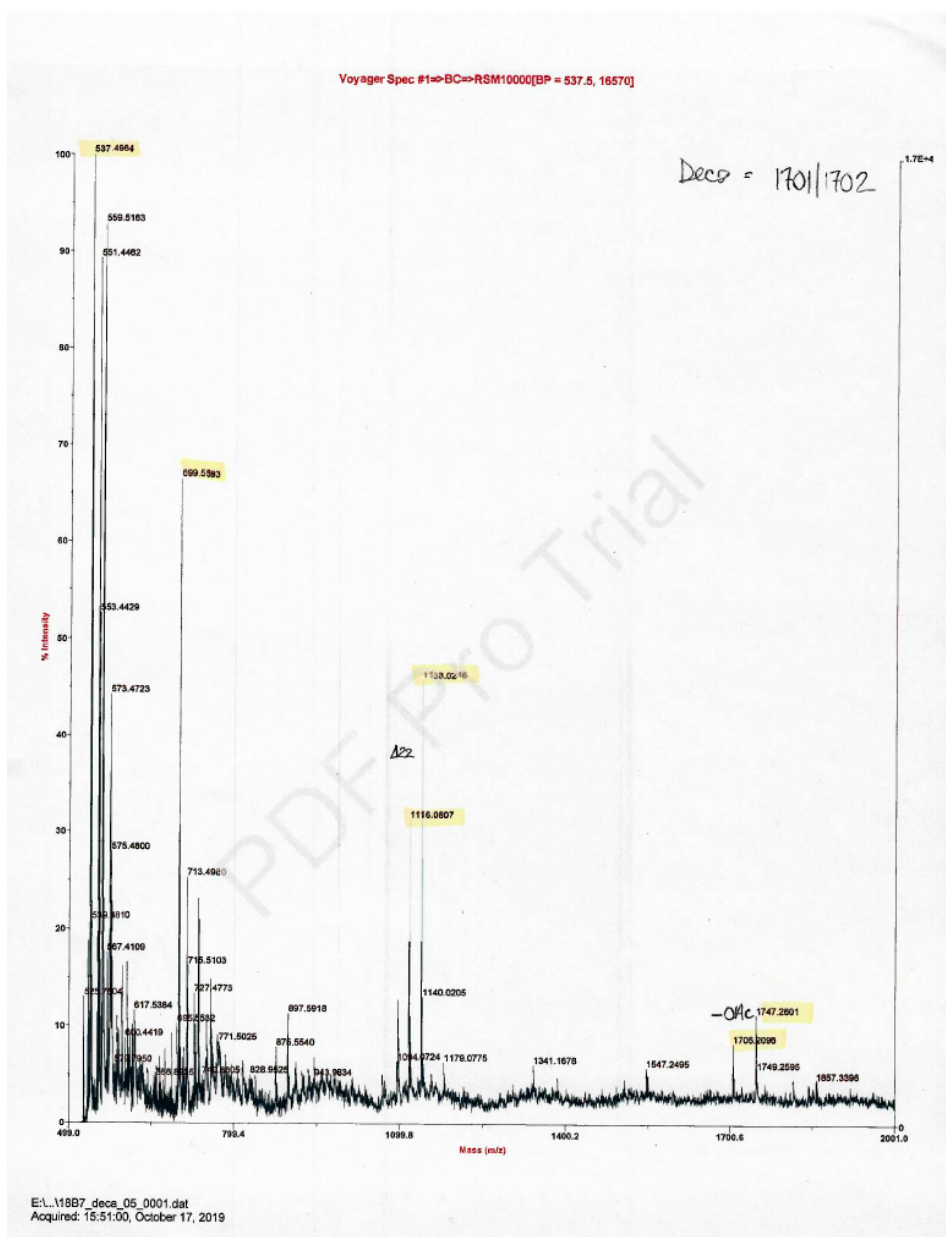

**Figure S9. Mass Spectrum of 18B7 and Decasaccharide Incubation.** Ion 1116.08  $m/z$  corresponds to hexasaccharide fragment +  $[NMe_2 + 45]$ , dimethylamine is a commonly observed adduct when using preconditioning deprecation strategy as described by Crawford *et al.* (28)

Breakdown Products 1

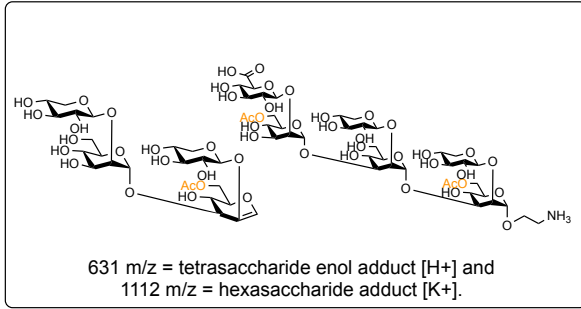

Breakdown Products 2

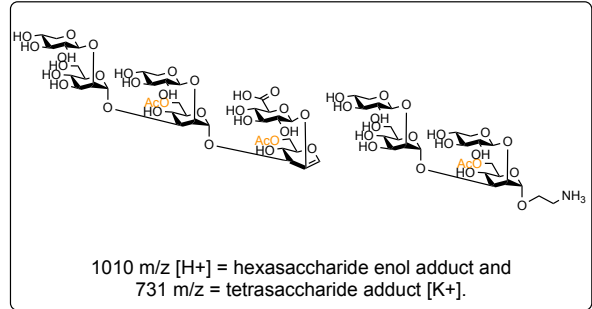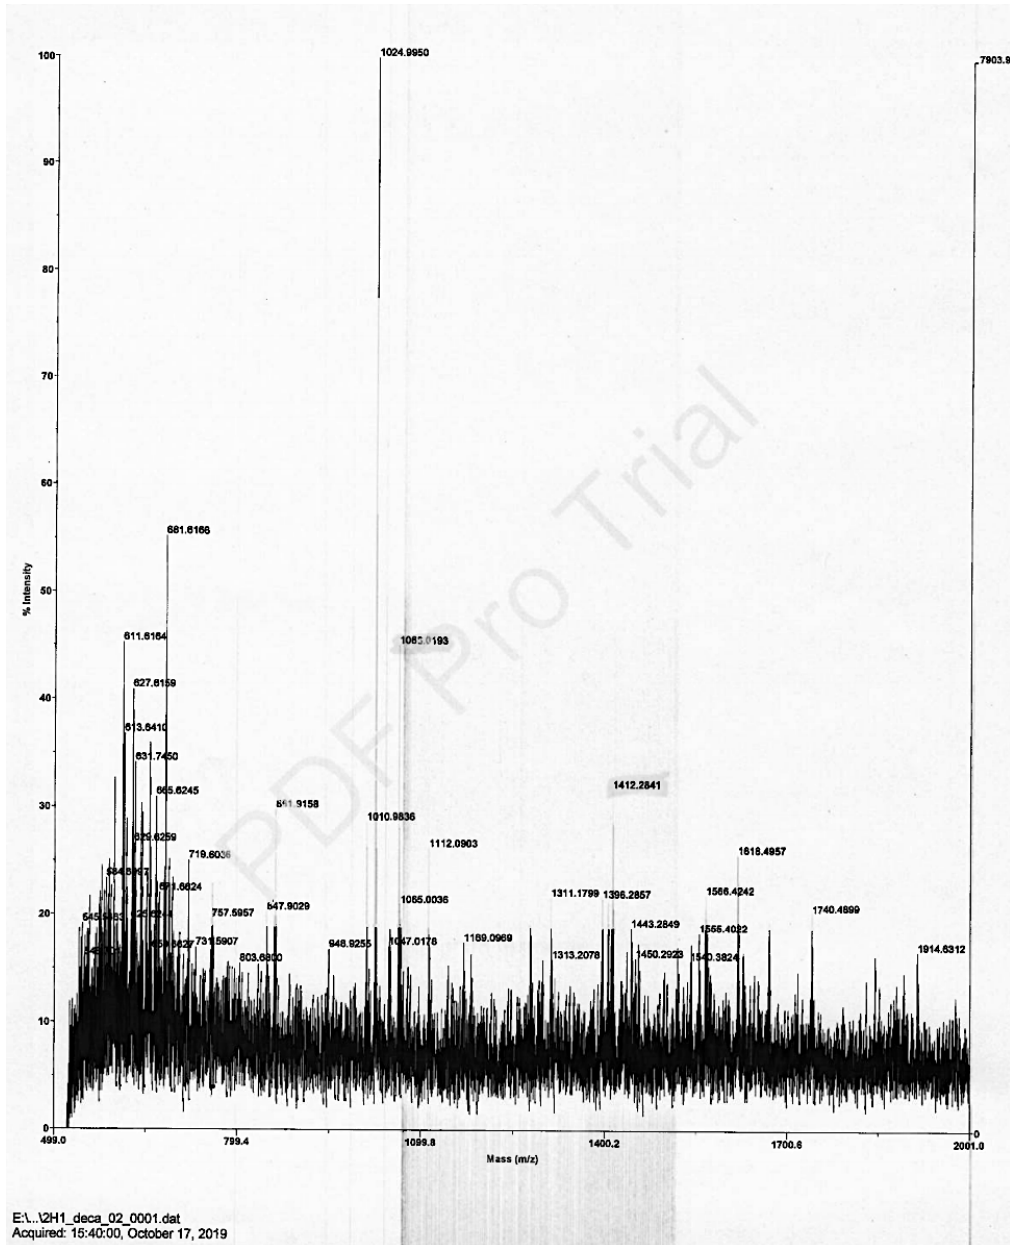

Figure S10. Mass Spectrum of 2H1 mAb and Decasaccharide Suggests Lyase Activity.

## NMR Nomenclature

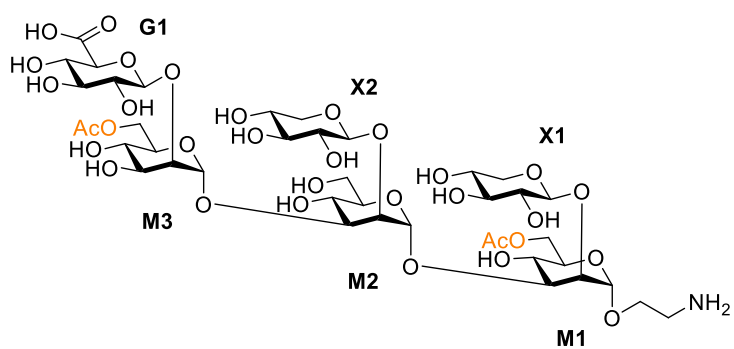

## Compound Characterization

**Ethyl 2,3,4-tri-O-benzyl-β-D-xylopyranosyl-(1→2)-4,6-di-O-benzyl-3-O-(3-phthalimido-propyl)-α-D-mannopyranosyl-(1→3)-[2,3,4-tri-O-benzyl-β-D-xylo-pyranosyl-(1→2)]-6-O-acetyl-4-O-benzyl-1-thio-α-D-mannopyranoside (9)**

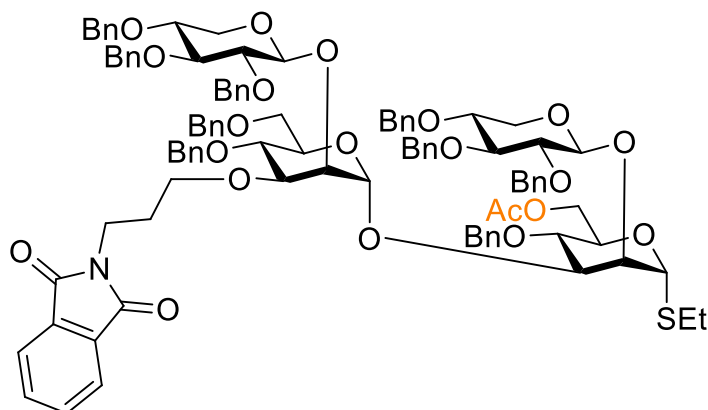

Tetrasaccharide **8** (100 mg, 66.57  $\mu$ mole, 1 eq) was dissolved in dry DMF (0.6 mL, 0.1M) and stirred with 4 Å MS for 1 h at room temperature, under nitrogen a atmosphere. The reaction was cooled to 0 °C, and 60% dispersion in mineral oil NaH was added (5.5 mg, 133.15  $\mu$ mole, 2 eq). The reaction was left to stir for 5 minutes and *N*-(3-Bromopropyl)phthalimide (90 mg, 332.88  $\mu$ mole, 5 eq) was added and the reaction was allowed to raise to room temperature. Once complete, the reaction was quenched with acetic acid dissolved in 1 mL ethyl acetate at 0 °C and concentrated *in vacuo* and subsequently purified *via* flash chromatography (cyclohexane:acetone, gradient) to yield **9** (88 mg, 78%) as a colorless syrup. **Rf** (cyclohexane:acetone, 80:20) = 0.2 **<sup>1</sup>H NMR** (500 MHz, Chloroform-*d*)  $\delta$  7.78 – 7.69 (m, 2H, H<sub>ar</sub>), 7.69 – 7.60 (m, 2H, H<sub>ar</sub>), 7.50 – 7.03 (m, 45H, H<sub>ar</sub>), 5.29 (s, 1H, H-1<sub>M2</sub>), 5.26 (s, 1H, H-1<sub>M2</sub>), 5.13 – 4.91 (m, 4H), 4.91 – 4.74 (m, 4H), 4.72 – 4.46 (m, 9H), 4.45 – 4.18 (m, 10H, H-1<sub>X1</sub>), 4.02 – 3.69 (m, 10H, H-1<sub>X2</sub>), 3.69 – 3.30 (m, 8H), 3.14 – 2.98 (m, 1H, H-5<sub>axial X1</sub>), 2.82 (t, J = 10.8 Hz, 1H, H-5<sub>axial X2</sub>), 2.63 – 2.43 (m, 2H, SCH<sub>2</sub>CH<sub>3</sub>), 2.11 – 1.91 (m, 2H, (Phth)NCH<sub>2</sub>CH<sub>2</sub>CH<sub>2</sub>O), 1.84 (s, 3H, C(=O)CH<sub>3</sub>), 1.22 (t, J = 7.4 Hz, 3H, SCH<sub>2</sub>CH<sub>3</sub>). **<sup>13</sup>C NMR** (126 MHz, Chloroform-*d*)  $\delta$  170.6, 139.2, 138.8, 138.6, 138.4, 138.4, 138.3, 138.1, 138.1, 133.8, 132.1, 128.8, 128.5, 128.5, 128.3, 128.2, 128.2, 128.2, 128.1, 127.9, 127.8, 127.6, 127.6, 127.5, 127.4, 127.4, 127.3, 127.1, 123.1, 103.9 (C1<sub>X1</sub>), 103.8 (C1<sub>X2</sub>), 100.7, 83.8, 83.5, 82.8, 81.3, 80.9, 78.9, 77.5, 77.3, 75.8, 75.5, 75.3, 75.0, 74.9, 74.9, 74.7, 73.4, 73.0, 72.5, 72.1, 70.1, 70.0, 67.2, 63.7, 63.4, 63.2, 35.3, 29.2 (PhthNCH<sub>2</sub>CH<sub>2</sub>CH<sub>2</sub>O), 25.5 (SCH<sub>2</sub>CH<sub>3</sub>), 20.6 (C(=O)CH<sub>3</sub>), 15.0 (SCH<sub>2</sub>CH<sub>3</sub>). **HRMS (ESI)** [M + Na]<sup>+</sup> m/z Calc. for C<sub>100</sub>H<sub>107</sub>NO<sub>21</sub>NaS 1712.6954 Found: 1712.6954.



**2-Azidoethyl 2,3,4-tri-O-benzyl- $\beta$ -D-xylopyranosyl-(1 $\rightarrow$ 2)-4,6-di-O-benzyl-3-O-(3-phthalimido-propyl)- $\alpha$ -D-mannopyranosyl-(1 $\rightarrow$ 3)-[2,3,4-tri-O-benzyl- $\beta$ -D-xylopyranosyl-(1 $\rightarrow$ 2)]-6-O-acetyl-4-O-benzyl- $\alpha$ -D-mannopyranosyl-(1 $\rightarrow$ 3)-[benzyl 2,3,4-tri-O-benzyl- $\beta$ -D-glucopyranosyluronate-(1 $\rightarrow$ 2)]-6-O-acetyl-4-O-benzyl- $\alpha$ -D-mannopyranosyl-(1 $\rightarrow$ 3)-[2,3,4-tri-O-benzyl- $\beta$ -D-xylopyranosyl-(1 $\rightarrow$ 2)]-4,6-di-O-benzyl- $\alpha$ -D-mannopyranosyl-(1 $\rightarrow$ 3)-[2,3,4-tri-O-benzyl- $\beta$ -D-xylopyranosyl-(1 $\rightarrow$ 2)]-6-O-acetyl-4-O-benzyl- $\alpha$ -D-mannopyranoside (10)**

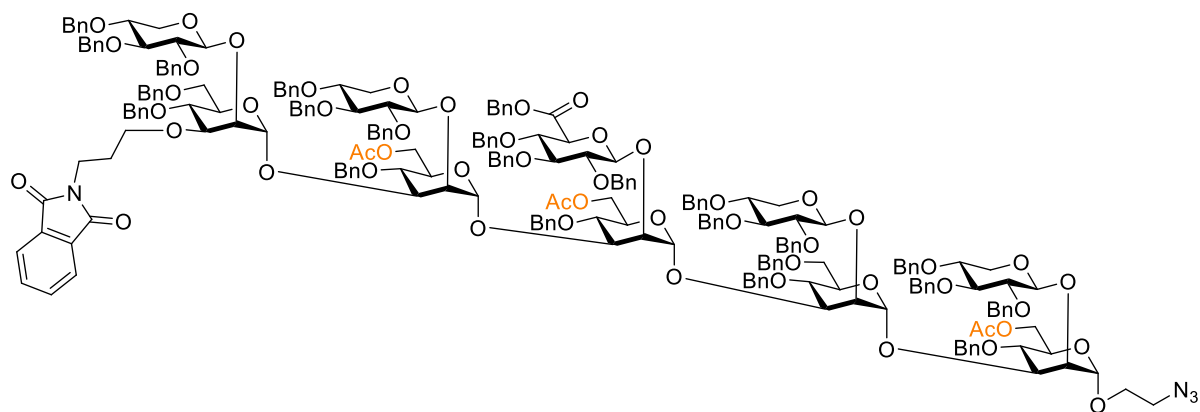

Tetrasaccharide donor **9** (50 mg, 30.5  $\mu$ mole, 1.5 eq) and Hexasaccharide acceptor **7** (48 mg, 20  $\mu$ mole, 1 eq) were dissolved in dry diethylether (2 mL, 0.01M) at room temperature, under nitrogen. 4 Å MS were added, and the reaction was stirred for 1 h. The reaction was cooled to 0 °C, and DMTST (15 mg, 61  $\mu$ mole, 3 eq) was added, the reaction was monitored *via* TLC (cyclohexane:acetone, 80:20, v/v) once complete ca. 4 h, the reaction was quenched with triethylamine, and left stir for 5 minutes. The reaction was filtered through a bed of Ceilte® and concentrated *in vacuo*, the resulting residue was purified by flash chromatography (cyclohexane:acetone, gradient) to yield **10** (57 mg, 85%) as a colourless oil. **R<sub>f</sub>** (cyclohexane-acetone, 80:20) = 0.3. **<sup>1</sup>H NMR** (600 MHz, Chloroform-*d*)  $\delta$  7.73 (dd, *J* = 5.4, 2.9 Hz, 1H), 7.71 – 7.67 (m, 2H), 7.67 – 7.49 (m, 3H), 7.47 – 7.34 (m, 12H, H<sub>ar</sub>), 7.34 – 7.02 (m, 116H, H<sub>ar</sub>), 5.45 (s, 1H, H-1<sub>M5</sub>), 5.33 (s, 1H, H-1<sub>M3</sub>), 5.23 – 5.19 (m, 3H, H-1<sub>M2</sub>, H-1<sub>M4</sub>), 5.14 – 4.98 (m, 6H), 4.94 (d, *J* = 11.6 Hz, 4H), 4.89 – 4.72 (m, 11H), 4.73 – 4.47 (m, 27H), 4.45 – 4.23 (m, 17H), 4.23 – 4.08 (m, 16H), 4.08 – 3.82 (m, 14H), 3.82 – 3.61 (m, 11H), 3.62 – 3.46 (m, 7H), 3.44 (td, *J* = 9.5, 9.0, 3.8 Hz, 3H), 3.42 – 3.26 (m, 11H), 3.26 – 3.15 (m, 2H), 3.05 (t, *J* = 10.7 Hz, 1H, H-5<sub>axial X</sub>), 2.85 (t, *J* = 10.8 Hz, 1H, H-5<sub>axial X</sub>), 2.63 – 2.56 (m, 2H, PhthNCH<sub>2</sub>CH<sub>2</sub>CH<sub>2</sub>O), 2.03 – 1.88 (m, 3H), 1.85 (s, 3H, (C=O)CH<sub>3</sub> M<sub>1</sub>), 1.54 (d, *J* = 3.4 Hz, 6H, (C=O)CH<sub>3</sub> M<sub>3</sub>, (C=O)CH<sub>3</sub> M<sub>4</sub>). **<sup>13</sup>C NMR** (151 MHz, Chloroform-*d*)  $\delta$  170.6, 170.4, 168.2, 168.1, 167.7, 139.3, 139.1, 138.9, 138.8, 138.8, 138.6, 138.6, 138.5, 138.4, 138.3, 138.3, 138.2, 138.1, 138.0, 137.9, 135.3, 133.8, 133.7, 133.7, 132.1, 132.1, 129.3, 128.8, 128.8, 128.8, 128.7, 128.7, 128.6, 128.6, 128.5, 128.4, 128.3, 128.3, 128.3, 128.27, 128.23, 128.19, 128.1, 128.1, 128.0, 127.9, 127.9, 127.8, 127.8, 127.7, 127.7, 127.6, 127.6, 127.5, 127.5, 127.5, 127.4, 127.4, 127.4, 127.3, 127.3, 127.3, 127.2, 127.2, 127.1, 127.0, 126.8, 126.6, 126.0, 123.1, 123.0, 104.3 (C-1<sub>X1</sub>), 103.3 (C-1<sub>X3</sub>), 103.2 (C-1<sub>X4</sub>), 102.8 (C-1<sub>X2</sub>), 102.3 (C-1<sub>G1</sub>), 101.9 (C-1<sub>M4</sub>), 101.0 (C-1<sub>M2</sub>), 100.1 (C-1<sub>M3</sub>), 99.8 (C-1<sub>M5</sub>), 98.2 (C-1<sub>M1</sub>), 83.8, 83.4, 83.3, 83.3, 83.2, 81.5, 81.4, 81.3, 81.1, 80.7, 80.3, 79.5, 79.2, 78.8, 78.5, 78.2, 78.0, 77.5, 75.4, 75.4, 75.3, 75.2, 75.2, 75.2, 75.1, 75.0, 74.9, 74.8, 74.6, 74.5, 74.4, 74.4, 74.3, 74.0, 73.6, 73.5, 73.1,

72.9, 72.9, 72.7, 72.2, 72.0, 71.6, 70.4, 70.0, 69.7, 69.5, 68.9, 67.1, 67.1, 66.6, 63.7, 63.5, 63.2, 63.1, 63.0, 62.9, 50.2 (OCH<sub>2</sub>CH<sub>2</sub>N<sub>3</sub>), 35.3 (PhthNCH<sub>2</sub>CH<sub>2</sub>CH<sub>2</sub>O), 29.2 (PhthNCH<sub>2</sub>CH<sub>2</sub>CH<sub>2</sub>O), 20.6 (C(=O)CH<sub>3</sub> M<sub>1</sub>), 20.5 (C(=O)CH<sub>3</sub>) 20.4 (C(=O)CH<sub>3</sub>). **Mass (ESI)** [M + H]<sup>+</sup> m/z Calc. for C<sub>236</sub>H<sub>249</sub>N<sub>4</sub>O<sub>53</sub> 3986.69 Found: 3986.68.

**2-Azidoethyl 2,3,4-tri-O-benzyl-β-D-xylopyranosyl-(1→2)-4,6-di-O-benzyl-3-O-(3-tert-butylloxycarbonylpropyl)-α-D-mannopyranosyl-(1→3)-[2,3,4-tri-O-benzyl-β-D-xylopyranosyl-(1→2)]-6-O-acetyl-4-O-benzyl-α-D-mannopyranosyl-(1→3)-[benzyl 2,3,4-tri-O-benzyl-β-D-glucopyranosyluronate-(1→2)]-6-O-acetyl-4-O-benzyl-α-D-mannopyranosyl-(1→3)-[2,3,4-tri-O-benzyl-β-D-xylopyranosyl-(1→2)]-4,6-di-O-benzyl-α-D-mannopyranosyl-(1→3)-[2,3,4-tri-O-benzyl-β-D-xylopyranosyl-(1→2)]-6-O-acetyl-4-O-benzyl-α-D-mannopyranoside** (12)

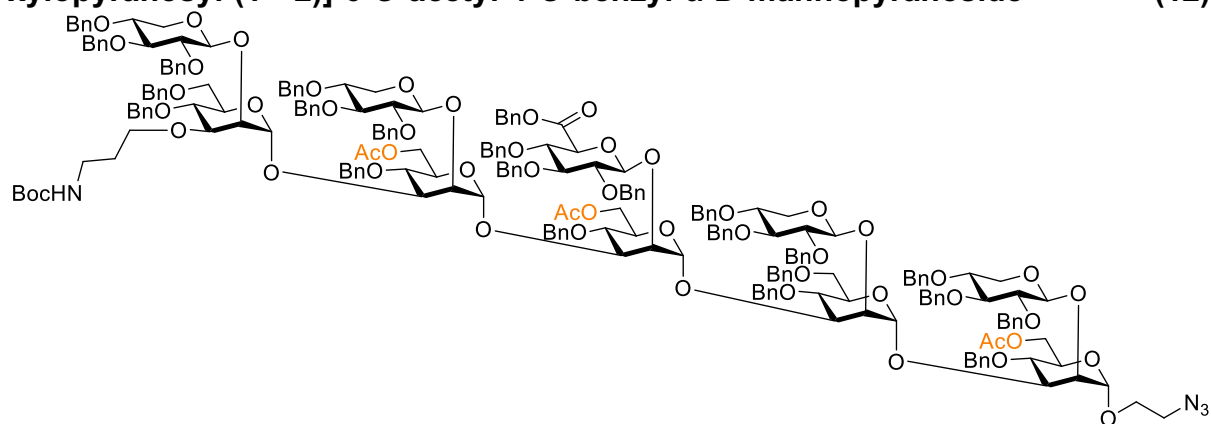

Compound **10** (50 mg, 12.54 μmole, 1 eq) was dissolved in *n*-BuOH (0.6 mL, 0.2M) and ethylene diamine (41 μL, 627 μmole, 100 eq) was added, the reaction was heated to 90°C in a sealed microwave vial under nitrogen, and left overnight (**Rf** 0.65, toluene:acetone, 80:20 + drop of AcOH, v/v). The reaction was then concentrated *in vacuo* and co-evaporated with toluene (1 mL X3). The residue was then dissolved in THF:H<sub>2</sub>O (2 mL, 70:30, v/v). Then NaHCO<sub>3</sub> (10 mg, 119 μmole, 9.5 eq) and Boc<sub>2</sub>O (2.8 μL, 45.87 μmole, 3.65 eq) were added. Once complete the reaction was diluted with DCM and the organic layer was extracted and washed with MilliQ water, and then concentrated *in vacuo*. The resulting residue was purified by flash column chromatography (cyclohexane:ethyl acetate, gradient) to yield **12** (28 mg, 57%) as a colorless oil. **Rf** (toluene:ethyl acetate, 80:20) = 0.8. <sup>1</sup>H NMR (600 MHz, Chloroform-*d*) δ 7.47 – 7.32 (m, 12H H<sub>ar</sub>), 7.39 – 6.76 (m, 108H, H<sub>ar</sub>), 5.45 (s, 1H, H-1<sub>M5</sub>), 5.33 (s, 1H, H-1<sub>M5</sub>), 5.20 (dd, *J* = 11.9, 7.4 Hz, 3H, H-1<sub>M5</sub>), 5.14 – 5.06 (m, 2H, H-1<sub>M5</sub>), 5.07 – 5.01 (m, 2H), 5.01 – 4.94 (m, 1H), 4.91 – 4.80 (m, 7H), 4.80 – 4.73 (m, 4H), 4.73 – 4.67 (m, 2H), 4.68 – 4.57 (m, 10H), 4.57 – 4.44 (m, 10H), 4.44 – 4.23 (m, 17H), 4.23 – 4.01 (m, 19H), 4.00 – 3.86 (m, 9H), 3.87 – 3.78 (m, 3H), 3.79 – 3.57 (m, 8H), 3.57 – 3.48 (m, 3H), 3.48 – 3.40 (m, 4H), 3.42 – 3.26 (m, 8H), 3.21 – 3.10 (m, 1H), 3.05 (s, 1H), 2.78 (s, 1H), 2.61 (t, *J* = 10.7 Hz, 1H, H-5<sub>axial</sub> X), 2.60 – 2.49 (m, 1H), 1.84 (s, 3H, (C=O)CH<sub>3</sub>), 1.81 – 1.65 (m, 2H, PhthNCH<sub>2</sub>CH<sub>2</sub>CH<sub>2</sub>O), 1.59 (s, 3H, (C=O)CH<sub>3</sub>), 1.54 (s, 3H, (C=O)CH<sub>3</sub>), 1.40 1.46 – 1.34 (m, 12H, 3 X CH<sub>3</sub> Boc). <sup>13</sup>C NMR (151 MHz, Chloroform-*d*) δ 170.6, 170.4, 139.2, 138.9, 138.8, 138.4, 138.3, 138.3, 128.9, 128.8, 128.7, 128.6, 128.5, 128.5, 128.3, 128.3, 128.2, 128.2, 128.2, 128.2, 128.1, 128.1, 128.0, 127.8, 127.7, 127.7, 127.6, 127.6, 127.5, 127.5, 127.5, 127.4, 127.4, 127.3, 127.3, 127.2, 127.2, 126.7, 126.6, 126.0, 104.3, 102.5, 83.7, 83.4, 83.3, 83.2, 81.5,

81.4, 81.1, 80.1, 79.2, 78.2, 75.3, 75.2, 75.2, 75.0, 74.6, 74.4, 74.3, 74.1, 73.6, 73.5, 73.1, 72.9, 72.7, 72.1, 71.6, 70.4, 69.7, 68.9, 67.1, 66.5, 63.6, 63.5, 63.2, 63.1, 63.0, 50.2, 38.0, 29.9, 28.5, 26.9, 20.6. **HRMS (ESI)**  $[M + Na]^+$   $m/z$  Calc. for  $C_{233}H_{254}N_4O_{53}Na$  3978.7201 Found: 3978.7369.

**7-methoxycoumarin-4-acetic acid-2-aminoethyl- $\beta$ -D-xylopyranosyl-(1 $\rightarrow$ 2) )-6-O-acetyl-3-O-(aminopropyl-N-(2,4-dinitrophenyl)glycine)- $\alpha$ -D-mannopyranosyl-(1 $\rightarrow$ 3)- $\beta$ -D-xylopyranosyl-(1 $\rightarrow$ 2)- $\alpha$ -D-mannopyranosyl-(1 $\rightarrow$ 3)-[ $\beta$ -D-glucopyranosyluronic acid-(1 $\rightarrow$ 2)]-6-O-acetyl- $\alpha$ -D-mannopyranosyl-(1 $\rightarrow$ 3)-[ $\beta$ -D-xylopyranosyl-(1 $\rightarrow$ 2)]- $\alpha$ -D-mannopyranosyl-(1 $\rightarrow$ 3)-[ $\beta$ -D-xylopyranosyl-(1 $\rightarrow$ 2)]-6-O-acetyl- $\alpha$ -D-mannopyranoside (16)**

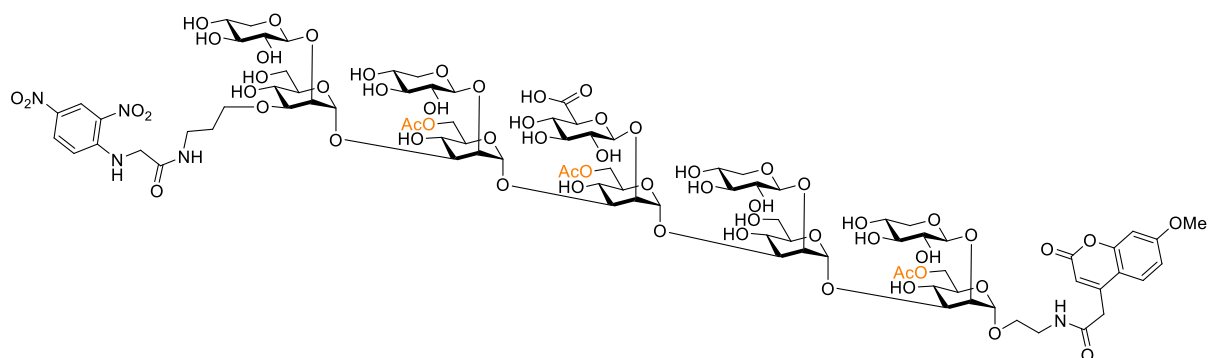

Compound **12** was dissolved in THF:*t*BuOH:PBS (100 mM, pH 5.5) (2 mL, 60:10:30, v/v/v) and “pre-treated 5% Pd/C catalyst” (370 mg, 0.5 eq per benzyl) was added. The reaction was put under an atmosphere of hydrogen (10 bar) and vigorously stirred for 2 days. The reaction was then filtered through a bed of Celite® and concentrated *in vacuo*. The residue was then dissolved in MilliQ water and purified *via* an automated size-exclusion chromatography system (P2 Biogel, flow rate 0.4 mL/min, eluent H<sub>2</sub>O:*t*BuOH, 99:1, v/v), then desired fractions were then collected and lyophilized to yield 8.1 mg (66%) of the desired deprotected intermediate. The intermediate was then dissolved in dry DMSO (0.5 mL) and 7-Methoxycoumarin-4-acetic Acid N-Succinimidyl Ester (7.2 mg, 5 eq) was added. The reaction was carried out in the dark and monitored *via* MALDITOF spectrometer (Super-DHB Matrix, Reflectron mode). Once complete, the unreacted NHS-ester was hydrolysed by the addition of water and stirred for 1 hour and concentrated. The resulting residue was purified *via* a Sep-Pak C18 cartridge (MeCN:H<sub>2</sub>O, 95:5, v/v), then desired fractions were then collected and lyophilized to yield 7.7 mg of the fluorescently labelled intermediate. The sugar was dissolved in 3M HCl MeOH:H<sub>2</sub>O (1 mL, 50:50, v/v) and stirred for ca. 1.5 hours, once complete removal of the *tert*-Butyloxycarbonyl was confirmed *via* MALDITOF (Super-DHB Matrix, Reflectron mode), the reaction was concentrated *in vacuo*. The resulting residue was dissolved in dry DMSO (500  $\mu$ L) and NEt<sub>3</sub> was added adjust the pH to 8. Then NHS activated *N*-(2,4-Dinitrophenyl) glycine (7.3 mg, 5 eq) was added and the reaction was stirred for 4 hours. The reaction mixture was then purified *via* an automated size-exclusion chromatography system (P2 Biogel, flow rate 0.4 mL/min, eluent H<sub>2</sub>O:*t*BuOH, 99:1, v/v), then desired fractions were then collected and lyophilized to yield 5.4 mg (56%) of the oligosaccharide FRET probe **16**. **Rf** (acetonitrile:water, 60:40) = 0.3. **<sup>1</sup>H NMR** (400 MHz, Deuterium Oxide)  $\delta$  9.16 (d,  $J$  = 2.7 Hz, 1H, H<sub>ar</sub> DNP), 8.42 – 8.28 (m, 1H, H<sub>ar</sub> DNP), 7.84 – 7.62 (m, 1H, H<sub>ar</sub> DNP), 7.09 – 7.02 (m, 2H, H<sub>ar</sub> MCA), 6.96 (d,  $J$  = 9.6 Hz, 1H, H<sub>ar</sub> MCA), 6.40 – 6.33 (m, 1H, H<sub>ar</sub> MCA) 5.33 (s, 1H, H-1<sub>M5</sub>), 5.25 (s, 1H, H-1<sub>M3</sub>), 5.22 (s, 1H, H-1<sub>M2</sub>), 5.16 (s, 1H, H-1<sub>M4</sub>), 4.95 (s, 1H, H-1<sub>M1</sub>), 4.54 (d,  $J$  = 8.1 Hz, 1H), 4.48 – 4.36 (m, 7H), 4.34 – 4.25 (m, 3H), 4.21

(s, 1H), 4.17 – 3.96 (m, 8H), 3.96 – 3.72 (m, 15H), 3.72 – 3.55 (m, 7H), 3.56 – 3.47 (m, 1H), 3.47 – 3.36 (m, 7H), 3.36 – 3.18 (m, 9H), 2.28 – 2.13 (m, 5H), 1.88 – 1.78 (m, 2H). <sup>13</sup>C NMR (126 MHz, Deuterium Oxide) δ 126.5, 111.4, 122.0, 128.2, 103.2, 115.4, 114.4, 102.4, 102.2, 103.9, 99.9, 104.9, 76.0, 76.2, 105.6, 105.7, 48.1, 79.5, 80.8, 81.6, 80.5, 80.3, 75.2, 78.0, 75.5, 80.3, 77.3, 67.2, 68.2, 68.9, 58.0, 62.5, 75.7, 68.2, 57.6, 67.2, 62.4, 62.4, 67.9, 79.7, 71.7, 38.6, 69.3, 79.3, 64.7, 38.4, 72.2, 64.5, 71.3, 68.0, 69.2, 73.7, 75.2, 64.5, 41.1, 77.5, 74.5, 74.7, 68.2, 67.2, 30.6, 23.8. HRMS (ESI) [M + Na]<sup>+</sup> m/z Calc. for C<sub>87</sub>H<sub>123</sub>N<sub>5</sub>O<sub>60</sub>Na 2220.6625 Found: 2220.6735.

**7-methoxycoumarin-4-acetic acid-2-aminoethyl-β-D-xylopyranosyl-(1→2)-3-O-(aminopropyl-N-(2,4-dinitrophenyl)glycine)-α-D-mannopyranosyl-(1→3)-[β-D-xylopyranosyl-(1→2)]-α-D-mannopyranosyl-(1→3)-[β-D-glucopyranosyluronic acid-(1→2)]-α-D-mannopyranosyl-(1→3)-[β-D-xylopyranosyl-(1→2)]-α-D-mannopyranosyl-(1→3)-[β-D-xylopyranosyl-(1→2)]-α-D-mannopyranoside (17)**

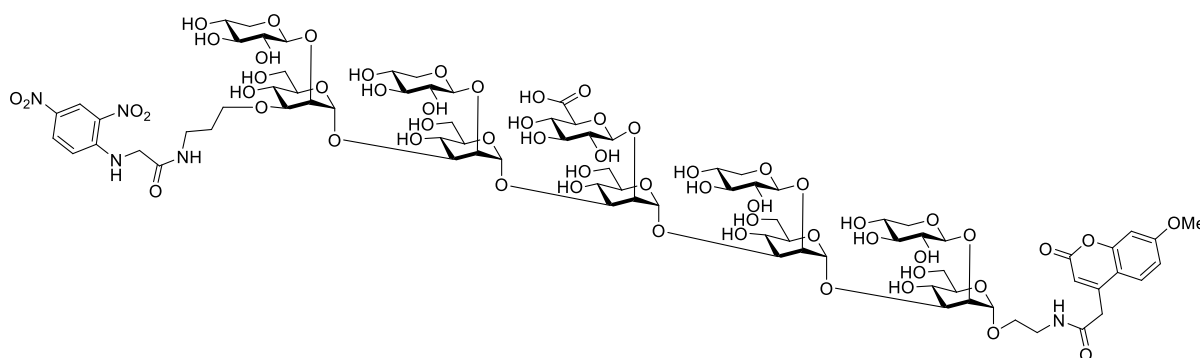

Compound **6** (3 mg) was dissolved in H<sub>2</sub>O – 5% trimethylamine and left for 6 hours. The reaction was then concentrated and purified *via* an automated size-exclusion chromatography system (P2 Biogel, flow rate 0.4 mL/min), and lyophilized to yield 2 mg of **17**. R<sub>f</sub> (acetonitrile:water, 60:40) = 0.22. <sup>1</sup>H NMR (500 MHz, Deuterium Oxide) δ 8.63 – 8.59 (m, 1H, H<sub>ar</sub> DNP), 8.20 – 8.14 (m, 2H, H<sub>ar</sub> DNP), 7.78 (d, *J* = 8.5, 1.6 Hz, 1H, H<sub>ar</sub> DNP), 7.70 (d, *J* = 8.8 Hz, 1H, H<sub>ar</sub> MCA), 7.10 – 7.03 (m, 2H, H<sub>ar</sub> MCA), 6.35 (s, 1H, H<sub>ar</sub> MCA), 5.34 (s, 1H, H-1<sub>M5</sub>), 5.22 (s, 2H, H-1<sub>M3</sub>, H-1<sub>M2</sub>), 5.12 (s, 1H, H-1<sub>M4</sub>), 4.95 (s, 1H, H-1<sub>M1</sub>), 4.51 – 4.46 (m, 9H), 4.44 – 4.33 (m, 5H), 4.31 – 4.24 (m, 4H), 4.23 – 4.19 (m, 2H), 4.14 – 4.05 (m, 2H), 4.01 (d, *J* = 16.3 Hz, 3H), 4.02 – 3.96 (m, 1H), 3.95 (s, 3H), 3.91 – 3.82 (m, 7H), 3.82 – 3.78 (m, 2H), 3.70 – 3.63 (m, 3H), 3.60 – 3.50 (m, 2H), 3.50 – 3.41 (m, 6H), 3.26 (s, 1H), 3.26 – 3.16 (m, 2H), 2.11 – 1.97 (m, 2H), 1.92 (s, 8H). <sup>13</sup>C NMR (126 MHz, Deuterium Oxide) δ 109.1, 118.1, 119.7, 125.9, 101.0, 113.1, 112.1, 100.1, 100.0, 101.6, 97.6, 102.6, 73.7, 73.9, 103.3, 103.4, 77.2, 79.4, 78.5, 78.2, 78.0, 72.9, 75.7, 73.2, 78.0, 75.0, 65.9, 64.9, 66.6, 55.8, 60.2, 59.2, 73.4, 65.9, 55.3, 64.9, 60.1, 60.1, 59.1, 65.6, 77.4, 69.4, 36.3, 77.0, 67.1, 62.6, 62.4, 69.9, 68.1, 69.1, 62.2, 65.7, 66.9, 71.4, 72.9, 62.2, 38.8, 75.2, 72.2, 72.4, 64.9 28.3. HRMS (ESI) [M + Na]<sup>+</sup> m/z Calc. for C<sub>81</sub>H<sub>117</sub>N<sub>5</sub>O<sub>57</sub>Na 2094.6308 Found: 2094.6204.

**2-aminoethyl- $\beta$ -D-xylopyranosyl-(1 $\rightarrow$ 2)- $\alpha$ -D-mannopyranosyl-(1 $\rightarrow$ 3)-[ $\beta$ -D-xylopyranosyl-(1 $\rightarrow$ 2)]- $\alpha$ -D-mannopyranosyl-(1 $\rightarrow$ 3)-[ $\beta$ -D-glucopyranosyluronic acid-(1 $\rightarrow$ 2)]- $\alpha$ -D-mannopyranosyl-(1 $\rightarrow$ 3)-[ $\beta$ -D-xylopyranosyl-(1 $\rightarrow$ 2)]- $\alpha$ -D-mannopyranosyl-(1 $\rightarrow$ 3)-[ $\beta$ -D-xylopyranosyl-(1 $\rightarrow$ 2)]- $\alpha$ -D-mannopyranoside (18)**

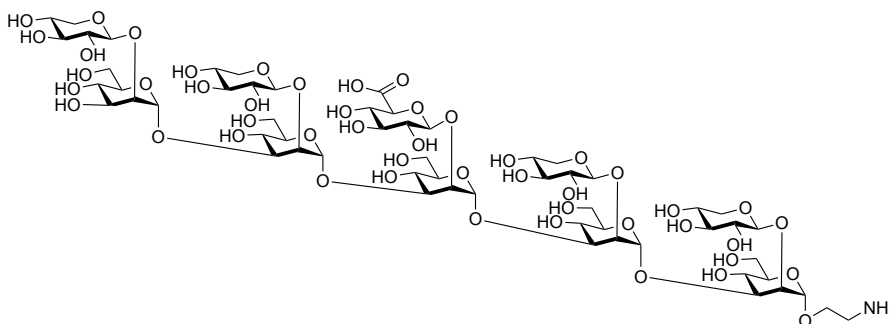

Acetylated deecasaccharide(20) (4 mg) was dissolved in H<sub>2</sub>O (0.5 mL), and sodium methoxide (0.5 mg, 9.40  $\mu$ mole, 4 eq) was added to the reaction and it was left overnight. The reaction was then concentrated and purified *via* an automated size-exclusion chromatography system (P2 Biogel, flow rate 0.4 mL/min), and lyophilized to yield 3.7 mg of **18**. **<sup>1</sup>H NMR** (600 MHz, Deuterium Oxide)  $\delta$  5.17 (s, 1H), 5.08 (s, 3H), 4.99 (s, 1H), 4.85 (s, 1H), 4.37 (d, *J* = 7.8 Hz, 1H), 4.32 (s, 1H), 4.30 (d, *J* = 7.8 Hz, 1H), 4.27 (s, 1H), 4.23 (s, 1H), 4.15 – 4.01 (m, 7H), 3.99 – 3.80 (m, 11H), 3.79 – 3.57 (m, 16H), 3.52 (s, 3H), 3.34 (s, 1H), 3.28 (s, 3H), 3.24 – 3.08 (m, 8H). **<sup>13</sup>C NMR** (151 MHz, Deuterium Oxide)  $\delta$  100.2, 100.2, 101.6, 98.0, 102.4, 101.9, 103.3, 103.4, 78.4, 77.4, 78.3, 77.6, 77.9, 77.3, 72.9, 75.9, 77.8, 63.5, 63.4, 65.0, 65.1, 73.3, 69.4, 66.2, 60.2, 63.4, 77.1, 67.0, 69.0, 69.1, 75.4, 72.2, 72.5, 38.9, 65.1. **HRMS (ESI)** [M + H]<sup>+</sup> *m/z* Calc. for C<sub>58</sub>H<sub>98</sub>NO<sub>48</sub>Na 1576.5230 Found: 2094.6204.

## Modeling Data

### Highest scoring docking output

```
MODEL 22
REMARK VINA RESULT:      -10.2      2.598      3.173
REMARK 0 active torsions:
REMARK status: ('A' for Active; 'I' for Inactive)
REMARK I between atoms: O1_2 and C1_3
REMARK I between atoms: C2_4 and O2_15
REMARK I between atoms: C3_5 and O3_14
REMARK I between atoms: C4_6 and O4_12
REMARK I between atoms: C5_7 and C6_8
REMARK I between atoms: C6_8 and O6_9
REMARK I between atoms: O3_14 and C1_16
REMARK I between atoms: O2_15 and C1_120
REMARK I between atoms: C2_17 and O2_28
REMARK I between atoms: C3_18 and O3_27
REMARK I between atoms: C4_19 and O4_25
REMARK I between atoms: C5_20 and C6_21
REMARK I between atoms: C6_21 and O6_22
REMARK I between atoms: O3_27 and C1_29
REMARK I between atoms: O2_28 and C1_108
REMARK I between atoms: C2_30 and O2_41
REMARK I between atoms: C3_31 and O3_40
REMARK I between atoms: C4_32 and O4_38
REMARK I between atoms: C5_33 and C6_34
REMARK I between atoms: C6_34 and O6_35
REMARK I between atoms: O3_40 and C1_42
REMARK I between atoms: O2_41 and C1_93
REMARK I between atoms: C2_43 and O2_54
REMARK I between atoms: C3_44 and O3_53
REMARK I between atoms: C4_45 and O4_51
REMARK I between atoms: C5_46 and C6_47
REMARK I between atoms: C6_47 and O6_48
REMARK I between atoms: O3_53 and C1_55
REMARK I between atoms: O2_54 and C1_81
REMARK I between atoms: C2_56 and O2_68
REMARK I between atoms: C3_57 and O3_66
REMARK I between atoms: C4_58 and O4_64
REMARK I between atoms: C5_59 and C6_60
REMARK I between atoms: C6_60 and O6_61
REMARK I between atoms: O2_68 and C1_69
REMARK I between atoms: C4_72 and O4_73
REMARK I between atoms: C3_75 and O3_76
REMARK I between atoms: C2_78 and O2_79
REMARK I between atoms: C4_84 and O4_85
REMARK I between atoms: C3_87 and O3_88
REMARK I between atoms: C2_90 and O2_91
REMARK I between atoms: C5_95 and C6_96
REMARK I between atoms: C4_99 and O4_100
REMARK I between atoms: C3_102 and O3_103
```

REMARK I between atoms: C2\_105 and O2\_106  
 REMARK I between atoms: C4\_111 and O4\_112  
 REMARK I between atoms: C3\_114 and O3\_115  
 REMARK I between atoms: C2\_117 and O2\_118  
 REMARK I between atoms: C4\_123 and O4\_124  
 REMARK I between atoms: C3\_126 and O3\_127  
 REMARK I between atoms: C2\_129 and O2\_130  
 ROOT  
 HETATM 1 HO1 ROH 1 -7.397 15.200 8.251 1.00  
 0.00 0.212 HD  
 HETATM 2 O1 ROH 1 -6.853 14.411 8.189 1.00  
 0.00 -0.369 OA  
 HETATM 3 C1 ZMA 2 -7.311 13.438 9.139 1.00  
 0.00 0.289 C  
 HETATM 4 C2 ZMA 2 -6.422 12.187 9.027 1.00  
 0.00 0.211 C  
 HETATM 5 C3 ZMA 2 -6.768 11.323 7.801 1.00  
 0.00 0.190 C  
 HETATM 6 C4 ZMA 2 -8.268 10.999 7.731 1.00  
 0.00 0.181 C  
 HETATM 7 C5 ZMA 2 -9.108 12.290 7.736 1.00  
 0.00 0.179 C  
 HETATM 8 C6 ZMA 2 -10.624 12.054 7.784 1.00  
 0.00 0.198 C  
 HETATM 9 O6 ZMA 2 -11.290 13.309 7.590 1.00  
 0.00 -0.398 OA  
 HETATM 10 H6O ZMA 2 -11.054 13.665 6.730 1.00  
 0.00 0.209 HD  
 HETATM 11 O5 ZMA 2 -8.736 13.089 8.932 1.00  
 0.00 -0.349 OA  
 HETATM 12 O4 ZMA 2 -8.516 10.298 6.500 1.00  
 0.00 -0.390 OA  
 HETATM 13 H4O ZMA 2 -8.020 9.477 6.496 1.00  
 0.00 0.210 HD  
 HETATM 14 O3 ZMA 2 -5.988 10.075 7.878 1.00  
 0.00 -0.348 OA  
 HETATM 15 O2 ZMA 2 -6.619 11.391 10.261 1.00  
 0.00 -0.346 OA  
 HETATM 16 C1 ZMA 3 -5.242 9.667 6.676 1.00  
 0.00 0.292 C  
 HETATM 17 C2 ZMA 3 -4.660 8.273 6.962 1.00  
 0.00 0.211 C  
 HETATM 18 C3 ZMA 3 -3.487 8.359 7.950 1.00  
 0.00 0.190 C  
 HETATM 19 C4 ZMA 3 -2.395 9.315 7.446 1.00  
 0.00 0.181 C  
 HETATM 20 C5 ZMA 3 -2.996 10.723 7.268 1.00  
 0.00 0.179 C  
 HETATM 21 C6 ZMA 3 -2.029 11.776 6.716 1.00  
 0.00 0.198 C

|        |        |     |     |   |        |        |        |      |
|--------|--------|-----|-----|---|--------|--------|--------|------|
| HETATM | 22     | O6  | ZMA | 3 | -2.666 | 13.058 | 6.788  | 1.00 |
| 0.00   | -0.398 | OA  |     |   |        |        |        |      |
| HETATM | 23     | H6O | ZMA | 3 | -2.888 | 13.254 | 7.701  | 1.00 |
| 0.00   | 0.209  | HD  |     |   |        |        |        |      |
| HETATM | 24     | O5  | ZMA | 3 | -4.152 | 10.620 | 6.341  | 1.00 |
| 0.00   | -0.348 | OA  |     |   |        |        |        |      |
| HETATM | 25     | O4  | ZMA | 3 | -1.345 | 9.373  | 8.424  | 1.00 |
| 0.00   | -0.390 | OA  |     |   |        |        |        |      |
| HETATM | 26     | H4O | ZMA | 3 | -0.985 | 8.493  | 8.556  | 1.00 |
| 0.00   | 0.210  | HD  |     |   |        |        |        |      |
| HETATM | 27     | O3  | ZMA | 3 | -2.951 | 7.011  | 8.179  | 1.00 |
| 0.00   | -0.348 | OA  |     |   |        |        |        |      |
| HETATM | 28     | O2  | ZMA | 3 | -4.187 | 7.680  | 5.692  | 1.00 |
| 0.00   | -0.346 | OA  |     |   |        |        |        |      |
| HETATM | 29     | C1  | ZMA | 4 | -2.904 | 6.567  | 9.585  | 1.00 |
| 0.00   | 0.292  | C   |     |   |        |        |        |      |
| HETATM | 30     | C2  | ZMA | 4 | -2.237 | 5.187  | 9.589  | 1.00 |
| 0.00   | 0.211  | C   |     |   |        |        |        |      |
| HETATM | 31     | C3  | ZMA | 4 | -3.186 | 4.132  | 9.010  | 1.00 |
| 0.00   | 0.190  | C   |     |   |        |        |        |      |
| HETATM | 32     | C4  | ZMA | 4 | -4.509 | 4.074  | 9.789  | 1.00 |
| 0.00   | 0.181  | C   |     |   |        |        |        |      |
| HETATM | 33     | C5  | ZMA | 4 | -5.204 | 5.446  | 9.707  | 1.00 |
| 0.00   | 0.179  | C   |     |   |        |        |        |      |
| HETATM | 34     | C6  | ZMA | 4 | -6.503 | 5.562  | 10.512 | 1.00 |
| 0.00   | 0.198  | C   |     |   |        |        |        |      |
| HETATM | 35     | O6  | ZMA | 4 | -7.128 | 6.811  | 10.187 | 1.00 |
| 0.00   | -0.398 | OA  |     |   |        |        |        |      |
| HETATM | 36     | H6O | ZMA | 4 | -7.345 | 6.825  | 9.252  | 1.00 |
| 0.00   | 0.209  | HD  |     |   |        |        |        |      |
| HETATM | 37     | O5  | ZMA | 4 | -4.257 | 6.482  | 10.201 | 1.00 |
| 0.00   | -0.348 | OA  |     |   |        |        |        |      |
| HETATM | 38     | O4  | ZMA | 4 | -5.356 | 3.081  | 9.190  | 1.00 |
| 0.00   | -0.390 | OA  |     |   |        |        |        |      |
| HETATM | 39     | H4O | ZMA | 4 | -4.916 | 2.228  | 9.220  | 1.00 |
| 0.00   | 0.210  | HD  |     |   |        |        |        |      |
| HETATM | 40     | O3  | ZMA | 4 | -2.498 | 2.836  | 9.015  | 1.00 |
| 0.00   | -0.348 | OA  |     |   |        |        |        |      |
| HETATM | 41     | O2  | ZMA | 4 | -1.910 | 4.799  | 10.975 | 1.00 |
| 0.00   | -0.346 | OA  |     |   |        |        |        |      |
| HETATM | 42     | C1  | ZMA | 5 | -2.395 | 2.180  | 7.701  | 1.00 |
| 0.00   | 0.292  | C   |     |   |        |        |        |      |
| HETATM | 43     | C2  | ZMA | 5 | -1.740 | 0.817  | 7.943  | 1.00 |
| 0.00   | 0.211  | C   |     |   |        |        |        |      |
| HETATM | 44     | C3  | ZMA | 5 | -0.237 | 0.975  | 8.213  | 1.00 |
| 0.00   | 0.190  | C   |     |   |        |        |        |      |
| HETATM | 45     | C4  | ZMA | 5 | 0.444  | 1.665  | 7.019  | 1.00 |
| 0.00   | 0.181  | C   |     |   |        |        |        |      |
| HETATM | 46     | C5  | ZMA | 5 | -0.127 | 3.094  | 6.921  | 1.00 |
| 0.00   | 0.179  | C   |     |   |        |        |        |      |



|        |        |     |     |   |        |        |        |      |
|--------|--------|-----|-----|---|--------|--------|--------|------|
| HETATM | 47     | C6  | ZMA | 5 | 0.433  | 3.964  | 5.790  | 1.00 |
| 0.00   | 0.198  | C   |     |   |        |        |        |      |
| HETATM | 48     | O6  | ZMA | 5 | -0.082 | 5.295  | 5.944  | 1.00 |
| 0.00   | -0.398 | OA  |     |   |        |        |        |      |
| HETATM | 49     | H6O | ZMA | 5 | 0.200  | 5.650  | 6.792  | 1.00 |
| 0.00   | 0.209  | HD  |     |   |        |        |        |      |
| HETATM | 50     | O5  | ZMA | 5 | -1.598 | 2.976  | 6.725  | 1.00 |
| 0.00   | -0.348 | OA  |     |   |        |        |        |      |
| HETATM | 51     | O4  | ZMA | 5 | 1.860  | 1.709  | 7.238  | 1.00 |
| 0.00   | -0.390 | OA  |     |   |        |        |        |      |
| HETATM | 52     | H4O | ZMA | 5 | 2.047  | 2.212  | 8.035  | 1.00 |
| 0.00   | 0.210  | HD  |     |   |        |        |        |      |
| HETATM | 53     | O3  | ZMA | 5 | 0.330  | -0.352 | 8.500  | 1.00 |
| 0.00   | -0.348 | OA  |     |   |        |        |        |      |
| HETATM | 54     | O2  | ZMA | 5 | -1.924 | -0.012 | 6.732  | 1.00 |
| 0.00   | -0.346 | OA  |     |   |        |        |        |      |
| HETATM | 55     | C1  | 2MA | 6 | 0.926  | -0.496 | 9.841  | 1.00 |
| 0.00   | 0.292  | C   |     |   |        |        |        |      |
| HETATM | 56     | C2  | 2MA | 6 | 1.515  | -1.909 | 9.951  | 1.00 |
| 0.00   | 0.211  | C   |     |   |        |        |        |      |
| HETATM | 57     | C3  | 2MA | 6 | 0.448  | -2.994 | 10.190 | 1.00 |
| 0.00   | 0.183  | C   |     |   |        |        |        |      |
| HETATM | 58     | C4  | 2MA | 6 | -0.494 | -2.639 | 11.354 | 1.00 |
| 0.00   | 0.180  | C   |     |   |        |        |        |      |
| HETATM | 59     | C5  | 2MA | 6 | -1.136 | -1.256 | 11.141 | 1.00 |
| 0.00   | 0.179  | C   |     |   |        |        |        |      |
| HETATM | 60     | C6  | 2MA | 6 | -2.006 | -0.766 | 12.305 | 1.00 |
| 0.00   | 0.198  | C   |     |   |        |        |        |      |
| HETATM | 61     | O6  | 2MA | 6 | -2.682 | 0.433  | 11.899 | 1.00 |
| 0.00   | -0.398 | OA  |     |   |        |        |        |      |
| HETATM | 62     | H6O | 2MA | 6 | -3.271 | 0.235  | 11.166 | 1.00 |
| 0.00   | 0.209  | HD  |     |   |        |        |        |      |
| HETATM | 63     | O5  | 2MA | 6 | -0.053 | -0.265 | 10.934 | 1.00 |
| 0.00   | -0.348 | OA  |     |   |        |        |        |      |
| HETATM | 64     | O4  | 2MA | 6 | -1.548 | -3.616 | 11.398 | 1.00 |
| 0.00   | -0.390 | OA  |     |   |        |        |        |      |
| HETATM | 65     | H4O | 2MA | 6 | -1.166 | -4.492 | 11.491 | 1.00 |
| 0.00   | 0.210  | HD  |     |   |        |        |        |      |
| HETATM | 66     | O3  | 2MA | 6 | 1.106  | -4.243 | 10.474 | 1.00 |
| 0.00   | -0.390 | OA  |     |   |        |        |        |      |
| HETATM | 67     | H3O | 2MA | 6 | 1.715  | -4.451 | 9.761  | 1.00 |
| 0.00   | 0.210  | HD  |     |   |        |        |        |      |
| HETATM | 68     | O2  | 2MA | 6 | 2.479  | -1.913 | 11.071 | 1.00 |
| 0.00   | -0.346 | OA  |     |   |        |        |        |      |
| HETATM | 69     | C1  | 0XB | 7 | 3.886  | -2.142 | 10.704 | 1.00 |
| 0.00   | 0.291  | C   |     |   |        |        |        |      |
| HETATM | 70     | O5  | 0XB | 7 | 4.047  | -3.421 | 9.978  | 1.00 |
| 0.00   | -0.356 | OA  |     |   |        |        |        |      |
| HETATM | 71     | C5  | 0XB | 7 | 5.424  | -3.762 | 9.586  | 1.00 |
| 0.00   | 0.205  | C   |     |   |        |        |        |      |

|        |        |     |     |   |        |        |        |      |
|--------|--------|-----|-----|---|--------|--------|--------|------|
| HETATM | 72     | C4  | 0XB | 7 | 6.258  | -3.906 | 10.862 | 1.00 |
| 0.00   | 0.173  | C   |     |   |        |        |        |      |
| HETATM | 73     | O4  | 0XB | 7 | 7.621  | -4.099 | 10.455 | 1.00 |
| 0.00   | -0.391 | OA  |     |   |        |        |        |      |
| HETATM | 74     | H4O | 0XB | 7 | 8.170  | -4.232 | 11.232 | 1.00 |
| 0.00   | 0.210  | HD  |     |   |        |        |        |      |
| HETATM | 75     | C3  | 0XB | 7 | 6.173  | -2.650 | 11.750 | 1.00 |
| 0.00   | 0.182  | C   |     |   |        |        |        |      |
| HETATM | 76     | O3  | 0XB | 7 | 6.770  | -2.965 | 13.021 | 1.00 |
| 0.00   | -0.390 | OA  |     |   |        |        |        |      |
| HETATM | 77     | H3O | 0XB | 7 | 6.723  | -2.198 | 13.596 | 1.00 |
| 0.00   | 0.210  | HD  |     |   |        |        |        |      |
| HETATM | 78     | C2  | 0XB | 7 | 4.715  | -2.216 | 12.001 | 1.00 |
| 0.00   | 0.204  | C   |     |   |        |        |        |      |
| HETATM | 79     | O2  | 0XB | 7 | 4.727  | -0.904 | 12.588 | 1.00 |
| 0.00   | -0.388 | OA  |     |   |        |        |        |      |
| HETATM | 80     | H2O | 0XB | 7 | 3.828  | -0.638 | 12.796 | 1.00 |
| 0.00   | 0.210  | HD  |     |   |        |        |        |      |
| HETATM | 81     | C1  | 0XB | 8 | -2.681 | -1.262 | 6.882  | 1.00 |
| 0.00   | 0.291  | C   |     |   |        |        |        |      |
| HETATM | 82     | O5  | 0XB | 8 | -2.078 | -2.137 | 7.908  | 1.00 |
| 0.00   | -0.356 | OA  |     |   |        |        |        |      |
| HETATM | 83     | C5  | 0XB | 8 | -2.735 | -3.438 | 8.105  | 1.00 |
| 0.00   | 0.205  | C   |     |   |        |        |        |      |
| HETATM | 84     | C4  | 0XB | 8 | -2.625 | -4.224 | 6.797  | 1.00 |
| 0.00   | 0.173  | C   |     |   |        |        |        |      |
| HETATM | 85     | O4  | 0XB | 8 | -3.373 | -5.438 | 6.971  | 1.00 |
| 0.00   | -0.391 | OA  |     |   |        |        |        |      |
| HETATM | 86     | H4O | 0XB | 8 | -3.268 | -5.991 | 6.193  | 1.00 |
| 0.00   | 0.210  | HD  |     |   |        |        |        |      |
| HETATM | 87     | C3  | 0XB | 8 | -3.207 | -3.436 | 5.611  | 1.00 |
| 0.00   | 0.182  | C   |     |   |        |        |        |      |
| HETATM | 88     | O3  | 0XB | 8 | -2.851 | -4.129 | 4.402  | 1.00 |
| 0.00   | -0.390 | OA  |     |   |        |        |        |      |
| HETATM | 89     | H3O | 0XB | 8 | -3.206 | -3.656 | 3.645  | 1.00 |
| 0.00   | 0.210  | HD  |     |   |        |        |        |      |
| HETATM | 90     | C2  | 0XB | 8 | -2.634 | -2.006 | 5.533  | 1.00 |
| 0.00   | 0.204  | C   |     |   |        |        |        |      |
| HETATM | 91     | O2  | 0XB | 8 | -3.418 | -1.254 | 4.591  | 1.00 |
| 0.00   | -0.388 | OA  |     |   |        |        |        |      |
| HETATM | 92     | H2O | 0XB | 8 | -3.039 | -0.378 | 4.488  | 1.00 |
| 0.00   | 0.210  | HD  |     |   |        |        |        |      |
| HETATM | 93     | C1  | 0ZB | 9 | -0.503 | 4.842  | 11.404 | 1.00 |
| 0.00   | 0.293  | C   |     |   |        |        |        |      |
| HETATM | 94     | O5  | 0ZB | 9 | 0.369  | 4.068  | 10.493 | 1.00 |
| 0.00   | -0.340 | OA  |     |   |        |        |        |      |
| HETATM | 95     | C5  | 0ZB | 9 | 1.779  | 3.927  | 10.909 | 1.00 |
| 0.00   | 0.256  | C   |     |   |        |        |        |      |
| HETATM | 96     | C6  | 0ZB | 9 | 2.657  | 3.410  | 9.734  | 1.00 |
| 0.00   | 0.206  | C   |     |   |        |        |        |      |

|        |        |     |     |    |        |        |        |      |
|--------|--------|-----|-----|----|--------|--------|--------|------|
| HETATM | 97     | O6B | OZB | 9  | 3.336  | 2.368  | 9.896  | 1.00 |
| 0.00   | -0.646 | OA  |     |    |        |        |        |      |
| HETATM | 98     | O6A | OZB | 9  | 2.625  | 4.105  | 8.697  | 1.00 |
| 0.00   | -0.646 | OA  |     |    |        |        |        |      |
| HETATM | 99     | C4  | OZB | 9  | 1.787  | 3.107  | 12.214 | 1.00 |
| 0.00   | 0.189  | C   |     |    |        |        |        |      |
| HETATM | 100    | O4  | OZB | 9  | 3.143  | 2.995  | 12.683 | 1.00 |
| 0.00   | -0.390 | OA  |     |    |        |        |        |      |
| HETATM | 101    | H4O | OZB | 9  | 3.670  | 2.543  | 12.019 | 1.00 |
| 0.00   | 0.210  | HD  |     |    |        |        |        |      |
| HETATM | 102    | C3  | OZB | 9  | 0.963  | 3.831  | 13.294 | 1.00 |
| 0.00   | 0.183  | C   |     |    |        |        |        |      |
| HETATM | 103    | O3  | OZB | 9  | 0.829  | 2.949  | 14.423 | 1.00 |
| 0.00   | -0.390 | OA  |     |    |        |        |        |      |
| HETATM | 104    | H3O | OZB | 9  | 1.701  | 2.713  | 14.746 | 1.00 |
| 0.00   | 0.210  | HD  |     |    |        |        |        |      |
| HETATM | 105    | C2  | OZB | 9  | -0.453 | 4.201  | 12.806 | 1.00 |
| 0.00   | 0.204  | C   |     |    |        |        |        |      |
| HETATM | 106    | O2  | OZB | 9  | -1.005 | 5.156  | 13.730 | 1.00 |
| 0.00   | -0.388 | OA  |     |    |        |        |        |      |
| HETATM | 107    | H2O | OZB | 9  | -1.886 | 5.406  | 13.443 | 1.00 |
| 0.00   | 0.210  | HD  |     |    |        |        |        |      |
| HETATM | 108    | C1  | 0XB | 10 | -4.875 | 6.459  | 5.233  | 1.00 |
| 0.00   | 0.291  | C   |     |    |        |        |        |      |
| HETATM | 109    | O5  | 0XB | 10 | -4.767 | 5.377  | 6.233  | 1.00 |
| 0.00   | -0.356 | OA  |     |    |        |        |        |      |
| HETATM | 110    | C5  | 0XB | 10 | -5.351 | 4.078  | 5.862  | 1.00 |
| 0.00   | 0.205  | C   |     |    |        |        |        |      |
| HETATM | 111    | C4  | 0XB | 10 | -4.618 | 3.560  | 4.625  | 1.00 |
| 0.00   | 0.173  | C   |     |    |        |        |        |      |
| HETATM | 112    | O4  | 0XB | 10 | -5.279 | 2.351  | 4.220  | 1.00 |
| 0.00   | -0.391 | OA  |     |    |        |        |        |      |
| HETATM | 113    | H4O | 0XB | 10 | -4.811 | 1.964  | 3.476  | 1.00 |
| 0.00   | 0.210  | HD  |     |    |        |        |        |      |
| HETATM | 114    | C3  | 0XB | 10 | -4.673 | 4.583  | 3.477  | 1.00 |
| 0.00   | 0.182  | C   |     |    |        |        |        |      |
| HETATM | 115    | O3  | 0XB | 10 | -3.794 | 4.125  | 2.434  | 1.00 |
| 0.00   | -0.390 | OA  |     |    |        |        |        |      |
| HETATM | 116    | H3O | 0XB | 10 | -3.846 | 4.724  | 1.687  | 1.00 |
| 0.00   | 0.210  | HD  |     |    |        |        |        |      |
| HETATM | 117    | C2  | 0XB | 10 | -4.199 | 5.980  | 3.932  | 1.00 |
| 0.00   | 0.204  | C   |     |    |        |        |        |      |
| HETATM | 118    | O2  | 0XB | 10 | -4.530 | 6.923  | 2.900  | 1.00 |
| 0.00   | -0.388 | OA  |     |    |        |        |        |      |
| HETATM | 119    | H2O | 0XB | 10 | -4.214 | 7.794  | 3.150  | 1.00 |
| 0.00   | 0.210  | HD  |     |    |        |        |        |      |
| HETATM | 120    | C1  | 0XB | 11 | -5.448 | 11.249 | 11.148 | 1.00 |
| 0.00   | 0.291  | C   |     |    |        |        |        |      |
| HETATM | 121    | O5  | 0XB | 11 | -4.368 | 10.497 | 10.480 | 1.00 |
| 0.00   | -0.356 | OA  |     |    |        |        |        |      |

|         |      |        |     |    |        |        |        |      |
|---------|------|--------|-----|----|--------|--------|--------|------|
| HETATM  | 122  | C5     | 0XB | 11 | -3.168 | 10.206 | 11.283 | 1.00 |
|         | 0.00 | 0.205  | C   |    |        |        |        |      |
| HETATM  | 123  | C4     | 0XB | 11 | -3.587 | 9.355  | 12.482 | 1.00 |
|         | 0.00 | 0.173  | C   |    |        |        |        |      |
| HETATM  | 124  | O4     | 0XB | 11 | -2.422 | 9.181  | 13.302 | 1.00 |
|         | 0.00 | -0.391 | OA  |    |        |        |        |      |
| HETATM  | 125  | H4O    | 0XB | 11 | -2.631 | 8.603  | 14.038 | 1.00 |
|         | 0.00 | 0.210  | HD  |    |        |        |        |      |
| HETATM  | 126  | C3     | 0XB | 11 | -4.688 | 10.053 | 13.298 | 1.00 |
|         | 0.00 | 0.182  | C   |    |        |        |        |      |
| HETATM  | 127  | O3     | 0XB | 11 | -5.168 | 9.121  | 14.284 | 1.00 |
|         | 0.00 | -0.390 | OA  |    |        |        |        |      |
| HETATM  | 128  | H3O    | 0XB | 11 | -5.808 | 9.557  | 14.850 | 1.00 |
|         | 0.00 | 0.210  | HD  |    |        |        |        |      |
| HETATM  | 129  | C2     | 0XB | 11 | -5.878 | 10.473 | 12.408 | 1.00 |
|         | 0.00 | 0.204  | C   |    |        |        |        |      |
| HETATM  | 130  | O2     | 0XB | 11 | -6.728 | 11.340 | 13.179 | 1.00 |
|         | 0.00 | -0.388 | OA  |    |        |        |        |      |
| HETATM  | 131  | H2O    | 0XB | 11 | -7.485 | 11.598 | 12.648 | 1.00 |
|         | 0.00 | 0.210  | HD  |    |        |        |        |      |
| ENDROOT |      |        |     |    |        |        |        |      |
| TORSDOF | 51   |        |     |    |        |        |        |      |
| ENDMDL  |      |        |     |    |        |        |        |      |

## Ligand

REMARK 0 active torsions:  
 REMARK status: ('A' for Active; 'I' for Inactive)  
 REMARK I between atoms: O1\_2 and C1\_3

REMARK I between atoms: C2\_4 and O2\_15  
REMARK I between atoms: C3\_5 and O3\_14  
REMARK I between atoms: C4\_6 and O4\_12  
REMARK I between atoms: C5\_7 and C6\_8  
REMARK I between atoms: C6\_8 and O6\_9  
REMARK I between atoms: O3\_14 and C1\_16  
REMARK I between atoms: O2\_15 and C1\_120  
REMARK I between atoms: C2\_17 and O2\_28  
REMARK I between atoms: C3\_18 and O3\_27  
REMARK I between atoms: C4\_19 and O4\_25  
REMARK I between atoms: C5\_20 and C6\_21  
REMARK I between atoms: C6\_21 and O6\_22  
REMARK I between atoms: O3\_27 and C1\_29  
REMARK I between atoms: O2\_28 and C1\_108  
REMARK I between atoms: C2\_30 and O2\_41  
REMARK I between atoms: C3\_31 and O3\_40  
REMARK I between atoms: C4\_32 and O4\_38  
REMARK I between atoms: C5\_33 and C6\_34  
REMARK I between atoms: C6\_34 and O6\_35  
REMARK I between atoms: O3\_40 and C1\_42  
REMARK I between atoms: O2\_41 and C1\_93  
REMARK I between atoms: C2\_43 and O2\_54  
REMARK I between atoms: C3\_44 and O3\_53  
REMARK I between atoms: C4\_45 and O4\_51  
REMARK I between atoms: C5\_46 and C6\_47  
REMARK I between atoms: C6\_47 and O6\_48  
REMARK I between atoms: O3\_53 and C1\_55  
REMARK I between atoms: O2\_54 and C1\_81  
REMARK I between atoms: C2\_56 and O2\_68  
REMARK I between atoms: C3\_57 and O3\_66  
REMARK I between atoms: C4\_58 and O4\_64  
REMARK I between atoms: C5\_59 and C6\_60  
REMARK I between atoms: C6\_60 and O6\_61  
REMARK I between atoms: O2\_68 and C1\_69  
REMARK I between atoms: C4\_72 and O4\_73  
REMARK I between atoms: C3\_75 and O3\_76  
REMARK I between atoms: C2\_78 and O2\_79  
REMARK I between atoms: C4\_84 and O4\_85  
REMARK I between atoms: C3\_87 and O3\_88  
REMARK I between atoms: C2\_90 and O2\_91  
REMARK I between atoms: C5\_95 and C6\_96  
REMARK I between atoms: C4\_99 and O4\_100  
REMARK I between atoms: C3\_102 and O3\_103  
REMARK I between atoms: C2\_105 and O2\_106  
REMARK I between atoms: C4\_111 and O4\_112  
REMARK I between atoms: C3\_114 and O3\_115  
REMARK I between atoms: C2\_117 and O2\_118  
REMARK I between atoms: C4\_123 and O4\_124  
REMARK I between atoms: C3\_126 and O3\_127  
REMARK I between atoms: C2\_129 and O2\_130  
ROOT

|        |        |     |     |   |        |        |        |      |
|--------|--------|-----|-----|---|--------|--------|--------|------|
| HETATM | 1      | HO1 | ROH | 1 | 5.637  | 7.938  | -1.582 | 1.00 |
| 0.00   | 0.212  | HD  |     |   |        |        |        |      |
| HETATM | 2      | O1  | ROH | 1 | 5.997  | 8.616  | -2.158 | 1.00 |
| 0.00   | -0.369 | OA  |     |   |        |        |        |      |
| HETATM | 3      | C1  | ZMA | 2 | 5.340  | 8.559  | -3.433 | 1.00 |
| 0.00   | 0.289  | C   |     |   |        |        |        |      |
| HETATM | 4      | C2  | ZMA | 2 | 5.936  | 9.648  | -4.342 | 1.00 |
| 0.00   | 0.211  | C   |     |   |        |        |        |      |
| HETATM | 5      | C3  | ZMA | 2 | 5.409  | 11.054 | -4.004 | 1.00 |
| 0.00   | 0.190  | C   |     |   |        |        |        |      |
| HETATM | 6      | C4  | ZMA | 2 | 3.874  | 11.095 | -3.948 | 1.00 |
| 0.00   | 0.181  | C   |     |   |        |        |        |      |
| HETATM | 7      | C5  | ZMA | 2 | 3.335  | 10.060 | -2.943 | 1.00 |
| 0.00   | 0.179  | C   |     |   |        |        |        |      |
| HETATM | 8      | C6  | ZMA | 2 | 1.804  | 9.954  | -2.910 | 1.00 |
| 0.00   | 0.198  | C   |     |   |        |        |        |      |
| HETATM | 9      | O6  | ZMA | 2 | 1.426  | 9.111  | -1.814 | 1.00 |
| 0.00   | -0.398 | OA  |     |   |        |        |        |      |
| HETATM | 10     | H6O | ZMA | 2 | 1.732  | 9.501  | -0.991 | 1.00 |
| 0.00   | 0.209  | HD  |     |   |        |        |        |      |
| HETATM | 11     | O5  | ZMA | 2 | 3.873  | 8.724  | -3.308 | 1.00 |
| 0.00   | -0.349 | OA  |     |   |        |        |        |      |
| HETATM | 12     | O4  | ZMA | 2 | 3.478  | 12.406 | -3.510 | 1.00 |
| 0.00   | -0.390 | OA  |     |   |        |        |        |      |
| HETATM | 13     | H4O | ZMA | 2 | 3.784  | 13.059 | -4.143 | 1.00 |
| 0.00   | 0.210  | HD  |     |   |        |        |        |      |
| HETATM | 14     | O3  | ZMA | 2 | 5.899  | 11.992 | -5.029 | 1.00 |
| 0.00   | -0.348 | OA  |     |   |        |        |        |      |
| HETATM | 15     | O2  | ZMA | 2 | 5.573  | 9.309  | -5.738 | 1.00 |
| 0.00   | -0.346 | OA  |     |   |        |        |        |      |
| HETATM | 16     | C1  | ZMA | 3 | 6.537  | 13.234 | -4.561 | 1.00 |
| 0.00   | 0.292  | C   |     |   |        |        |        |      |
| HETATM | 17     | C2  | ZMA | 3 | 6.803  | 14.097 | -5.805 | 1.00 |
| 0.00   | 0.211  | C   |     |   |        |        |        |      |
| HETATM | 18     | C3  | ZMA | 3 | 7.968  | 13.529 | -6.629 | 1.00 |
| 0.00   | 0.190  | C   |     |   |        |        |        |      |
| HETATM | 19     | C4  | ZMA | 3 | 9.241  | 13.385 | -5.781 | 1.00 |
| 0.00   | 0.181  | C   |     |   |        |        |        |      |
| HETATM | 20     | C5  | ZMA | 3 | 8.960  | 12.434 | -4.602 | 1.00 |
| 0.00   | 0.179  | C   |     |   |        |        |        |      |
| HETATM | 21     | C6  | ZMA | 3 | 10.132 | 12.237 | -3.634 | 1.00 |
| 0.00   | 0.198  | C   |     |   |        |        |        |      |
| HETATM | 22     | O6  | ZMA | 3 | 9.788  | 11.193 | -2.713 | 1.00 |
| 0.00   | -0.398 | OA  |     |   |        |        |        |      |
| HETATM | 23     | H6O | ZMA | 3 | 9.615  | 10.383 | -3.199 | 1.00 |
| 0.00   | 0.209  | HD  |     |   |        |        |        |      |
| HETATM | 24     | O5  | ZMA | 3 | 7.808  | 12.974 | -3.835 | 1.00 |
| 0.00   | -0.348 | OA  |     |   |        |        |        |      |
| HETATM | 25     | O4  | ZMA | 3 | 10.280 | 12.825 | -6.599 | 1.00 |
| 0.00   | -0.390 | OA  |     |   |        |        |        |      |

|        |        |     |     |   |        |        |         |      |
|--------|--------|-----|-----|---|--------|--------|---------|------|
| HETATM | 26     | H4O | ZMA | 3 | 10.441 | 13.402 | -7.349  | 1.00 |
| 0.00   | 0.210  | HD  |     |   |        |        |         |      |
| HETATM | 27     | O3  | ZMA | 3 | 8.199  | 14.392 | -7.795  | 1.00 |
| 0.00   | -0.348 | OA  |     |   |        |        |         |      |
| HETATM | 28     | O2  | ZMA | 3 | 7.134  | 15.473 | -5.374  | 1.00 |
| 0.00   | -0.346 | OA  |     |   |        |        |         |      |
| HETATM | 29     | C1  | ZMA | 4 | 8.151  | 13.726 | -9.110  | 1.00 |
| 0.00   | 0.292  | C   |     |   |        |        |         |      |
| HETATM | 30     | C2  | ZMA | 4 | 8.502  | 14.790 | -10.156 | 1.00 |
| 0.00   | 0.211  | C   |     |   |        |        |         |      |
| HETATM | 31     | C3  | ZMA | 4 | 7.346  | 15.782 | -10.320 | 1.00 |
| 0.00   | 0.190  | C   |     |   |        |        |         |      |
| HETATM | 32     | C4  | ZMA | 4 | 6.043  | 15.071 | -10.717 | 1.00 |
| 0.00   | 0.181  | C   |     |   |        |        |         |      |
| HETATM | 33     | C5  | ZMA | 4 | 5.662  | 14.063 | -9.616  | 1.00 |
| 0.00   | 0.179  | C   |     |   |        |        |         |      |
| HETATM | 34     | C6  | ZMA | 4 | 4.421  | 13.216 | -9.916  | 1.00 |
| 0.00   | 0.198  | C   |     |   |        |        |         |      |
| HETATM | 35     | O6  | ZMA | 4 | 4.081  | 12.475 | -8.736  | 1.00 |
| 0.00   | -0.398 | OA  |     |   |        |        |         |      |
| HETATM | 36     | H6O | ZMA | 4 | 3.871  | 13.086 | -8.026  | 1.00 |
| 0.00   | 0.209  | HD  |     |   |        |        |         |      |
| HETATM | 37     | O5  | ZMA | 4 | 6.812  | 13.143 | -9.404  | 1.00 |
| 0.00   | -0.348 | OA  |     |   |        |        |         |      |
| HETATM | 38     | O4  | ZMA | 4 | 5.000  | 16.051 | -10.839 | 1.00 |
| 0.00   | -0.390 | OA  |     |   |        |        |         |      |
| HETATM | 39     | H4O | ZMA | 4 | 5.244  | 16.693 | -11.510 | 1.00 |
| 0.00   | 0.210  | HD  |     |   |        |        |         |      |
| HETATM | 40     | O3  | ZMA | 4 | 7.736  | 16.790 | -11.312 | 1.00 |
| 0.00   | -0.348 | OA  |     |   |        |        |         |      |
| HETATM | 41     | O2  | ZMA | 4 | 8.739  | 14.141 | -11.461 | 1.00 |
| 0.00   | -0.346 | OA  |     |   |        |        |         |      |
| HETATM | 42     | C1  | ZMA | 5 | 7.692  | 18.183 | -10.837 | 1.00 |
| 0.00   | 0.292  | C   |     |   |        |        |         |      |
| HETATM | 43     | C2  | ZMA | 5 | 8.036  | 19.066 | -12.040 | 1.00 |
| 0.00   | 0.211  | C   |     |   |        |        |         |      |
| HETATM | 44     | C3  | ZMA | 5 | 9.538  | 19.002 | -12.352 | 1.00 |
| 0.00   | 0.190  | C   |     |   |        |        |         |      |
| HETATM | 45     | C4  | ZMA | 5 | 10.351 | 19.462 | -11.130 | 1.00 |
| 0.00   | 0.181  | C   |     |   |        |        |         |      |
| HETATM | 46     | C5  | ZMA | 5 | 10.103 | 18.445 | -9.998  | 1.00 |
| 0.00   | 0.179  | C   |     |   |        |        |         |      |
| HETATM | 47     | C6  | ZMA | 5 | 10.837 | 18.717 | -8.680  | 1.00 |
| 0.00   | 0.198  | C   |     |   |        |        |         |      |
| HETATM | 48     | O6  | ZMA | 5 | 10.624 | 17.600 | -7.803  | 1.00 |
| 0.00   | -0.398 | OA  |     |   |        |        |         |      |
| HETATM | 49     | H6O | ZMA | 5 | 10.977 | 16.804 | -8.209  | 1.00 |
| 0.00   | 0.209  | HD  |     |   |        |        |         |      |
| HETATM | 50     | O5  | ZMA | 5 | 8.642  | 18.435 | -9.716  | 1.00 |
| 0.00   | -0.348 | OA  |     |   |        |        |         |      |

|        |        |     |     |   |        |        |         |      |
|--------|--------|-----|-----|---|--------|--------|---------|------|
| HETATM | 51     | O4  | ZMA | 5 | 11.743 | 19.499 | -11.470 | 1.00 |
| 0.00   | -0.390 | OA  |     |   |        |        |         |      |
| HETATM | 52     | H4O | ZMA | 5 | 12.036 | 18.620 | -11.725 | 1.00 |
| 0.00   | 0.210  | HD  |     |   |        |        |         |      |
| HETATM | 53     | O3  | ZMA | 5 | 9.804  | 19.815 | -13.549 | 1.00 |
| 0.00   | -0.348 | OA  |     |   |        |        |         |      |
| HETATM | 54     | O2  | ZMA | 5 | 7.675  | 20.462 | -11.713 | 1.00 |
| 0.00   | -0.346 | OA  |     |   |        |        |         |      |
| HETATM | 55     | C1  | 2MA | 6 | 10.356 | 19.070 | -14.696 | 1.00 |
| 0.00   | 0.292  | C   |     |   |        |        |         |      |
| HETATM | 56     | C2  | 2MA | 6 | 10.624 | 20.070 | -15.828 | 1.00 |
| 0.00   | 0.211  | C   |     |   |        |        |         |      |
| HETATM | 57     | C3  | 2MA | 6 | 9.348  | 20.493 | -16.579 | 1.00 |
| 0.00   | 0.183  | C   |     |   |        |        |         |      |
| HETATM | 58     | C4  | 2MA | 6 | 8.507  | 19.284 | -17.026 | 1.00 |
| 0.00   | 0.180  | C   |     |   |        |        |         |      |
| HETATM | 59     | C5  | 2MA | 6 | 8.180  | 18.369 | -15.832 | 1.00 |
| 0.00   | 0.179  | C   |     |   |        |        |         |      |
| HETATM | 60     | C6  | 2MA | 6 | 7.439  | 17.077 | -16.198 | 1.00 |
| 0.00   | 0.198  | C   |     |   |        |        |         |      |
| HETATM | 61     | O6  | 2MA | 6 | 7.039  | 16.419 | -14.987 | 1.00 |
| 0.00   | -0.398 | OA  |     |   |        |        |         |      |
| HETATM | 62     | H6O | 2MA | 6 | 6.420  | 16.978 | -14.510 | 1.00 |
| 0.00   | 0.209  | HD  |     |   |        |        |         |      |
| HETATM | 63     | O5  | 2MA | 6 | 9.452  | 17.991 | -15.171 | 1.00 |
| 0.00   | -0.348 | OA  |     |   |        |        |         |      |
| HETATM | 64     | O4  | 2MA | 6 | 7.266  | 19.771 | -17.566 | 1.00 |
| 0.00   | -0.390 | OA  |     |   |        |        |         |      |
| HETATM | 65     | H4O | 2MA | 6 | 7.449  | 20.376 | -18.289 | 1.00 |
| 0.00   | 0.210  | HD  |     |   |        |        |         |      |
| HETATM | 66     | O3  | 2MA | 6 | 9.719  | 21.268 | -17.734 | 1.00 |
| 0.00   | -0.390 | OA  |     |   |        |        |         |      |
| HETATM | 67     | H3O | 2MA | 6 | 10.267 | 22.007 | -17.459 | 1.00 |
| 0.00   | 0.210  | HD  |     |   |        |        |         |      |
| HETATM | 68     | O2  | 2MA | 6 | 11.566 | 19.440 | -16.777 | 1.00 |
| 0.00   | -0.346 | OA  |     |   |        |        |         |      |
| HETATM | 69     | C1  | 0XB | 7 | 12.889 | 20.076 | -16.883 | 1.00 |
| 0.00   | 0.291  | C   |     |   |        |        |         |      |
| HETATM | 70     | O5  | 0XB | 7 | 12.768 | 21.501 | -17.262 | 1.00 |
| 0.00   | -0.356 | OA  |     |   |        |        |         |      |
| HETATM | 71     | C5  | 0XB | 7 | 14.037 | 22.228 | -17.423 | 1.00 |
| 0.00   | 0.205  | C   |     |   |        |        |         |      |
| HETATM | 72     | C4  | 0XB | 7 | 14.822 | 21.566 | -18.559 | 1.00 |
| 0.00   | 0.173  | C   |     |   |        |        |         |      |
| HETATM | 73     | O4  | 0XB | 7 | 16.110 | 22.198 | -18.606 | 1.00 |
| 0.00   | -0.391 | OA  |     |   |        |        |         |      |
| HETATM | 74     | H4O | 0XB | 7 | 16.618 | 21.833 | -19.334 | 1.00 |
| 0.00   | 0.210  | HD  |     |   |        |        |         |      |
| HETATM | 75     | C3  | 0XB | 7 | 15.013 | 20.056 | -18.323 | 1.00 |
| 0.00   | 0.182  | C   |     |   |        |        |         |      |



|        |        |     |     |   |        |        |         |      |
|--------|--------|-----|-----|---|--------|--------|---------|------|
| HETATM | 76     | O3  | 0XB | 7 | 15.529 | 19.480 | -19.536 | 1.00 |
| 0.00   | -0.390 | OA  |     |   |        |        |         |      |
| HETATM | 77     | H3O | 0XB | 7 | 15.650 | 18.535 | -19.416 | 1.00 |
| 0.00   | 0.210  | HD  |     |   |        |        |         |      |
| HETATM | 78     | C2  | 0XB | 7 | 13.684 | 19.350 | -17.985 | 1.00 |
| 0.00   | 0.204  | C   |     |   |        |        |         |      |
| HETATM | 79     | O2  | 0XB | 7 | 13.982 | 18.026 | -17.511 | 1.00 |
| 0.00   | -0.388 | OA  |     |   |        |        |         |      |
| HETATM | 80     | H2O | 0XB | 7 | 13.162 | 17.555 | -17.342 | 1.00 |
| 0.00   | 0.210  | HD  |     |   |        |        |         |      |
| HETATM | 81     | C1  | 0XB | 8 | 6.665  | 21.111 | -12.560 | 1.00 |
| 0.00   | 0.291  | C   |     |   |        |        |         |      |
| HETATM | 82     | O5  | 0XB | 8 | 7.065  | 21.098 | -13.982 | 1.00 |
| 0.00   | -0.356 | OA  |     |   |        |        |         |      |
| HETATM | 83     | C5  | 0XB | 8 | 6.141  | 21.765 | -14.912 | 1.00 |
| 0.00   | 0.205  | C   |     |   |        |        |         |      |
| HETATM | 84     | C4  | 0XB | 8 | 6.076  | 23.245 | -14.531 | 1.00 |
| 0.00   | 0.173  | C   |     |   |        |        |         |      |
| HETATM | 85     | O4  | 0XB | 8 | 5.083  | 23.853 | -15.371 | 1.00 |
| 0.00   | -0.391 | OA  |     |   |        |        |         |      |
| HETATM | 86     | H4O | 0XB | 8 | 5.064  | 24.799 | -15.209 | 1.00 |
| 0.00   | 0.210  | HD  |     |   |        |        |         |      |
| HETATM | 87     | C3  | 0XB | 8 | 5.677  | 23.434 | -13.057 | 1.00 |
| 0.00   | 0.182  | C   |     |   |        |        |         |      |
| HETATM | 88     | O3  | 0XB | 8 | 5.873  | 24.819 | -12.720 | 1.00 |
| 0.00   | -0.390 | OA  |     |   |        |        |         |      |
| HETATM | 89     | H3O | 0XB | 8 | 5.628  | 24.963 | -11.803 | 1.00 |
| 0.00   | 0.210  | HD  |     |   |        |        |         |      |
| HETATM | 90     | C2  | 0XB | 8 | 6.547  | 22.581 | -12.111 | 1.00 |
| 0.00   | 0.204  | C   |     |   |        |        |         |      |
| HETATM | 91     | O2  | 0XB | 8 | 5.944  | 22.593 | -10.806 | 1.00 |
| 0.00   | -0.388 | OA  |     |   |        |        |         |      |
| HETATM | 92     | H2O | 0XB | 8 | 6.504  | 22.113 | -10.191 | 1.00 |
| 0.00   | 0.210  | HD  |     |   |        |        |         |      |
| HETATM | 93     | C1  | 0ZB | 9 | 10.122 | 14.031 | -11.950 | 1.00 |
| 0.00   | 0.293  | C   |     |   |        |        |         |      |
| HETATM | 94     | O5  | 0ZB | 9 | 10.804 | 15.344 | -11.960 | 1.00 |
| 0.00   | -0.340 | OA  |     |   |        |        |         |      |
| HETATM | 95     | C5  | 0ZB | 9 | 12.150 | 15.372 | -12.566 | 1.00 |
| 0.00   | 0.256  | C   |     |   |        |        |         |      |
| HETATM | 96     | C6  | 0ZB | 9 | 12.894 | 16.691 | -12.212 | 1.00 |
| 0.00   | 0.206  | C   |     |   |        |        |         |      |
| HETATM | 97     | O6B | 0ZB | 9 | 13.330 | 17.411 | -13.142 | 1.00 |
| 0.00   | -0.646 | OA  |     |   |        |        |         |      |
| HETATM | 98     | O6A | 0ZB | 9 | 13.012 | 16.927 | -10.991 | 1.00 |
| 0.00   | -0.646 | OA  |     |   |        |        |         |      |
| HETATM | 99     | C4  | 0ZB | 9 | 11.982 | 15.032 | -14.060 | 1.00 |
| 0.00   | 0.189  | C   |     |   |        |        |         |      |
| HETATM | 100    | O4  | 0ZB | 9 | 13.282 | 14.994 | -14.676 | 1.00 |
| 0.00   | -0.390 | OA  |     |   |        |        |         |      |

|        |        |     |     |    |        |        |         |      |
|--------|--------|-----|-----|----|--------|--------|---------|------|
| HETATM | 101    | H4O | OZB | 9  | 13.697 | 15.856 | -14.590 | 1.00 |
| 0.00   | 0.210  | HD  |     |    |        |        |         |      |
| HETATM | 102    | C3  | OZB | 9  | 11.336 | 13.643 | -14.213 | 1.00 |
| 0.00   | 0.183  | C   |     |    |        |        |         |      |
| HETATM | 103    | O3  | OZB | 9  | 11.016 | 13.447 | -15.602 | 1.00 |
| 0.00   | -0.390 | OA  |     |    |        |        |         |      |
| HETATM | 104    | H3O | OZB | 9  | 11.816 | 13.522 | -16.126 | 1.00 |
| 0.00   | 0.210  | HD  |     |    |        |        |         |      |
| HETATM | 105    | C2  | OZB | 9  | 10.034 | 13.505 | -13.398 | 1.00 |
| 0.00   | 0.204  | C   |     |    |        |        |         |      |
| HETATM | 106    | O2  | OZB | 9  | 9.704  | 12.107 | -13.323 | 1.00 |
| 0.00   | -0.388 | OA  |     |    |        |        |         |      |
| HETATM | 107    | H2O | OZB | 9  | 8.898  | 11.996 | -12.814 | 1.00 |
| 0.00   | 0.210  | HD  |     |    |        |        |         |      |
| HETATM | 108    | C1  | 0XB | 10 | 6.197  | 16.538 | -5.777  | 1.00 |
| 0.00   | 0.291  | C   |     |    |        |        |         |      |
| HETATM | 109    | O5  | 0XB | 10 | 6.069  | 16.610 | -7.246  | 1.00 |
| 0.00   | -0.356 | OA  |     |    |        |        |         |      |
| HETATM | 110    | C5  | 0XB | 10 | 5.216  | 17.684 | -7.780  | 1.00 |
| 0.00   | 0.205  | C   |     |    |        |        |         |      |
| HETATM | 111    | C4  | 0XB | 10 | 5.818  | 19.025 | -7.361  | 1.00 |
| 0.00   | 0.173  | C   |     |    |        |        |         |      |
| HETATM | 112    | O4  | 0XB | 10 | 4.909  | 20.048 | -7.797  | 1.00 |
| 0.00   | -0.391 | OA  |     |    |        |        |         |      |
| HETATM | 113    | H4O | 0XB | 10 | 5.281  | 20.911 | -7.601  | 1.00 |
| 0.00   | 0.210  | HD  |     |    |        |        |         |      |
| HETATM | 114    | C3  | 0XB | 10 | 5.984  | 19.106 | -5.834  | 1.00 |
| 0.00   | 0.182  | C   |     |    |        |        |         |      |
| HETATM | 115    | O3  | 0XB | 10 | 6.742  | 20.292 | -5.534  | 1.00 |
| 0.00   | -0.390 | OA  |     |    |        |        |         |      |
| HETATM | 116    | H3O | 0XB | 10 | 6.820  | 20.389 | -4.583  | 1.00 |
| 0.00   | 0.210  | HD  |     |    |        |        |         |      |
| HETATM | 117    | C2  | 0XB | 10 | 6.751  | 17.888 | -5.276  | 1.00 |
| 0.00   | 0.204  | C   |     |    |        |        |         |      |
| HETATM | 118    | O2  | 0XB | 10 | 6.631  | 17.900 | -3.844  | 1.00 |
| 0.00   | -0.388 | OA  |     |    |        |        |         |      |
| HETATM | 119    | H2O | 0XB | 10 | 7.129  | 17.167 | -3.476  | 1.00 |
| 0.00   | 0.210  | HD  |     |    |        |        |         |      |
| HETATM | 120    | C1  | 0XB | 11 | 6.686  | 8.971  | -6.645  | 1.00 |
| 0.00   | 0.291  | C   |     |    |        |        |         |      |
| HETATM | 121    | O5  | 0XB | 11 | 7.576  | 10.131 | -6.844  | 1.00 |
| 0.00   | -0.356 | OA  |     |    |        |        |         |      |
| HETATM | 122    | C5  | 0XB | 11 | 8.685  | 9.959  | -7.798  | 1.00 |
| 0.00   | 0.205  | C   |     |    |        |        |         |      |
| HETATM | 123    | C4  | 0XB | 11 | 8.093  | 9.649  | -9.173  | 1.00 |
| 0.00   | 0.173  | C   |     |    |        |        |         |      |
| HETATM | 124    | O4  | 0XB | 11 | 9.194  | 9.378  | -10.053 | 1.00 |
| 0.00   | -0.391 | OA  |     |    |        |        |         |      |
| HETATM | 125    | H4O | 0XB | 11 | 8.865  | 9.234  | -10.943 | 1.00 |
| 0.00   | 0.210  | HD  |     |    |        |        |         |      |

|         |        |     |     |    |       |       |         |      |
|---------|--------|-----|-----|----|-------|-------|---------|------|
| HETATM  | 126    | C3  | 0XB | 11 | 7.171 | 8.419 | -9.113  | 1.00 |
| 0.00    | 0.182  | C   |     |    |       |       |         |      |
| HETATM  | 127    | O3  | 0XB | 11 | 6.502 | 8.304 | -10.382 | 1.00 |
| 0.00    | -0.390 | OA  |     |    |       |       |         |      |
| HETATM  | 128    | H3O | 0XB | 11 | 5.972 | 7.504 | -10.392 | 1.00 |
| 0.00    | 0.210  | HD  |     |    |       |       |         |      |
| HETATM  | 129    | C2  | 0XB | 11 | 6.099 | 8.563 | -8.011  | 1.00 |
| 0.00    | 0.204  | C   |     |    |       |       |         |      |
| HETATM  | 130    | O2  | 0XB | 11 | 5.459 | 7.287 | -7.841  | 1.00 |
| 0.00    | -0.388 | OA  |     |    |       |       |         |      |
| HETATM  | 131    | H2O | 0XB | 11 | 4.775 | 7.360 | -7.171  | 1.00 |
| 0.00    | 0.210  | HD  |     |    |       |       |         |      |
| ENDROOT |        |     |     |    |       |       |         |      |
| TORSDOF | 51     |     |     |    |       |       |         |      |

# NMR Spectra

## Compound 9

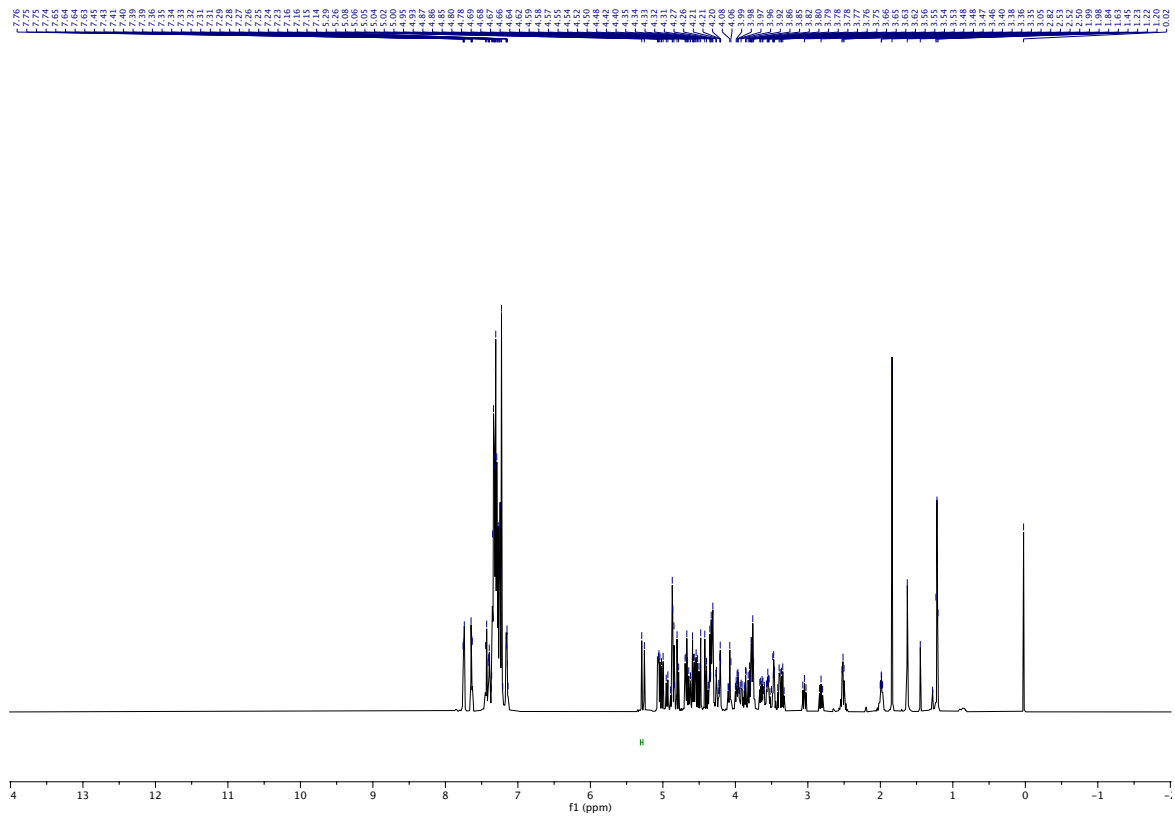

$^1\text{H}$  NMR  $\delta$  [ppm]

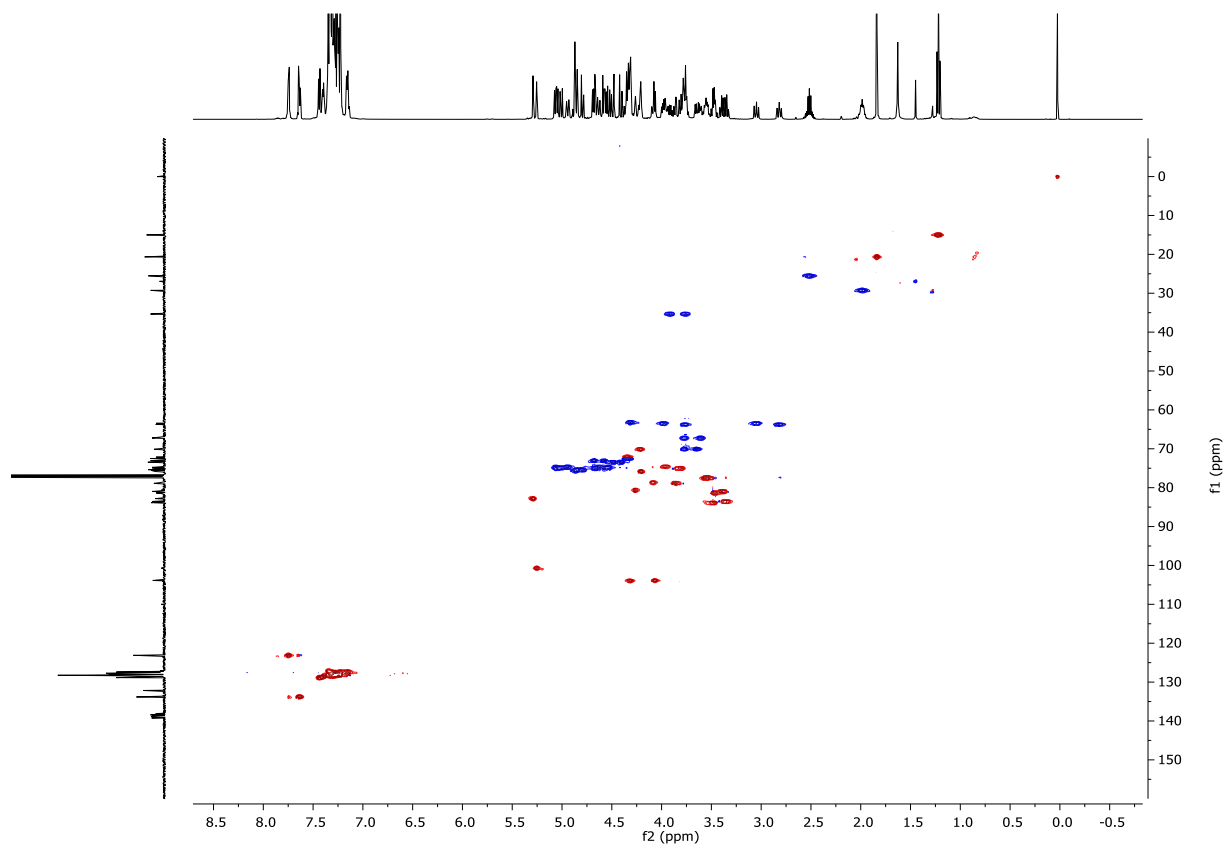

$^1\text{H}$ - $^{13}\text{C}$ -HSQC-NMR

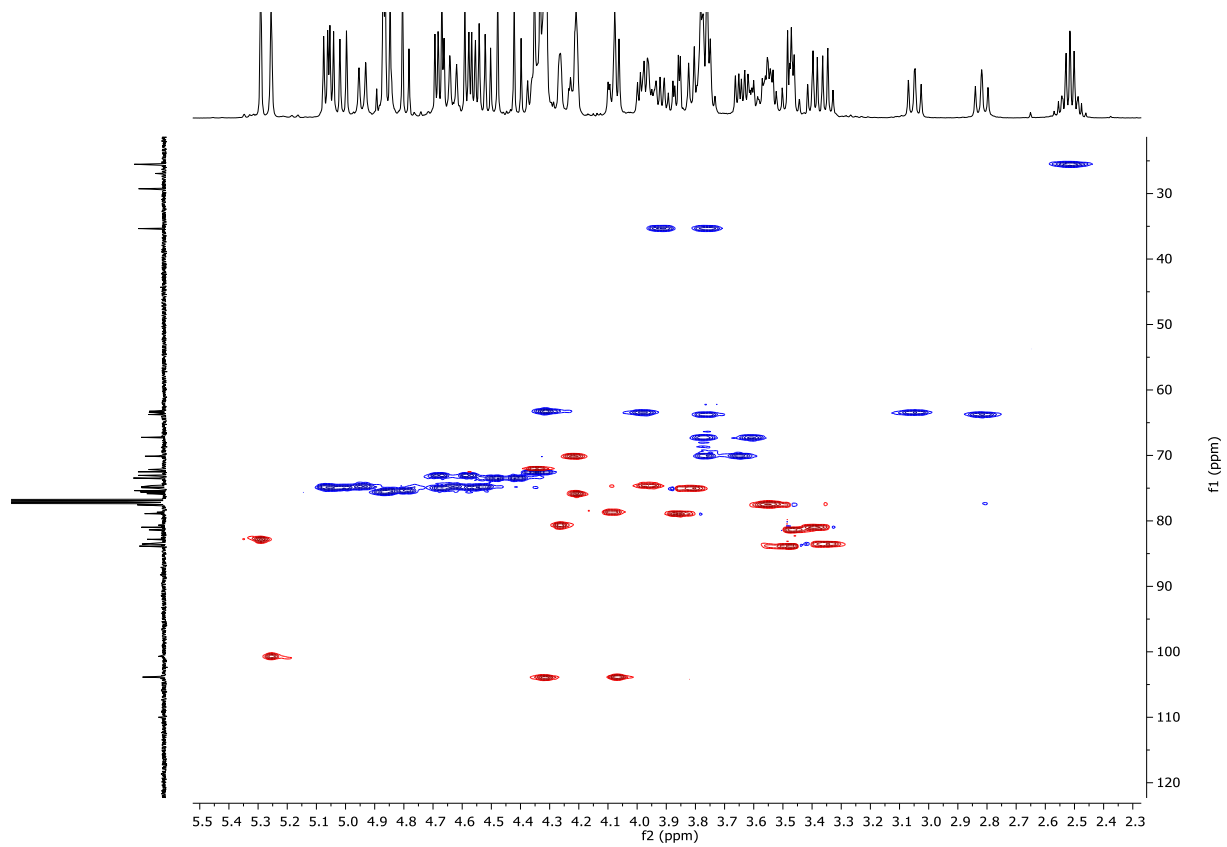

$^1\text{H}$ - $^{13}\text{C}$ -HSQC-NMR: zoomed



# Compound 10

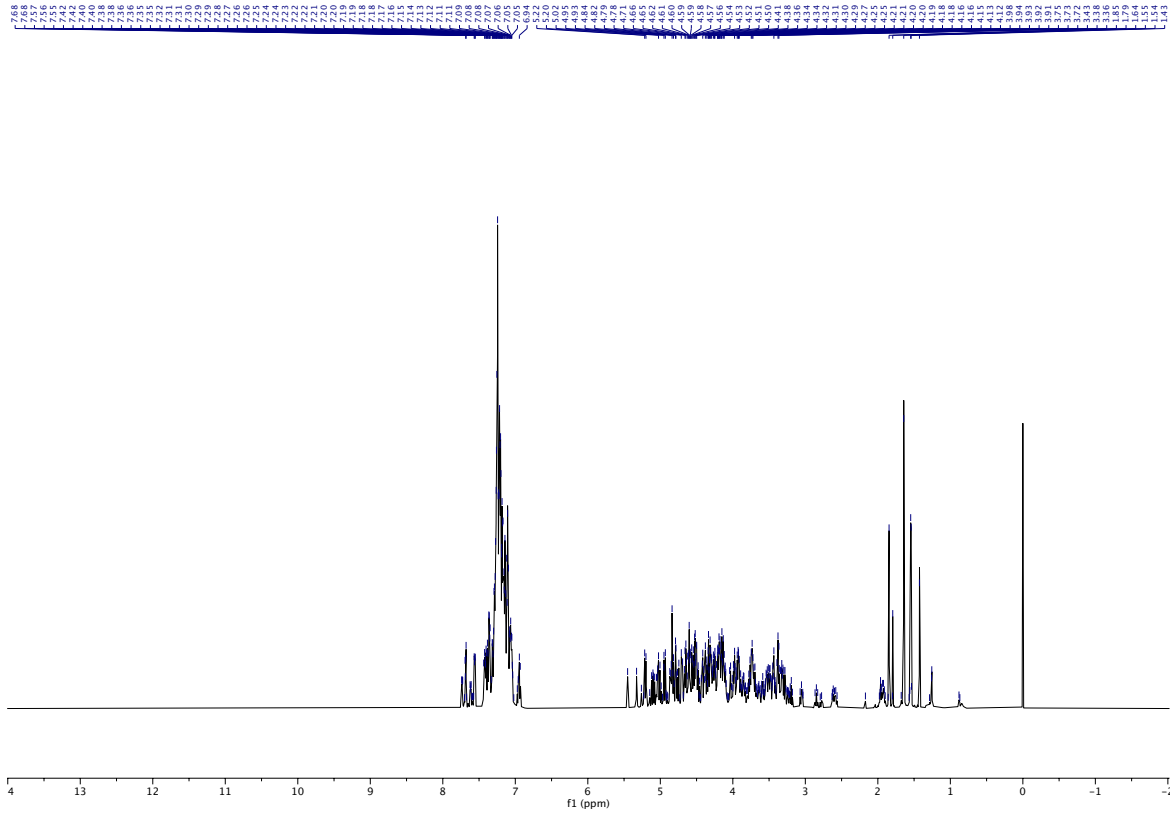

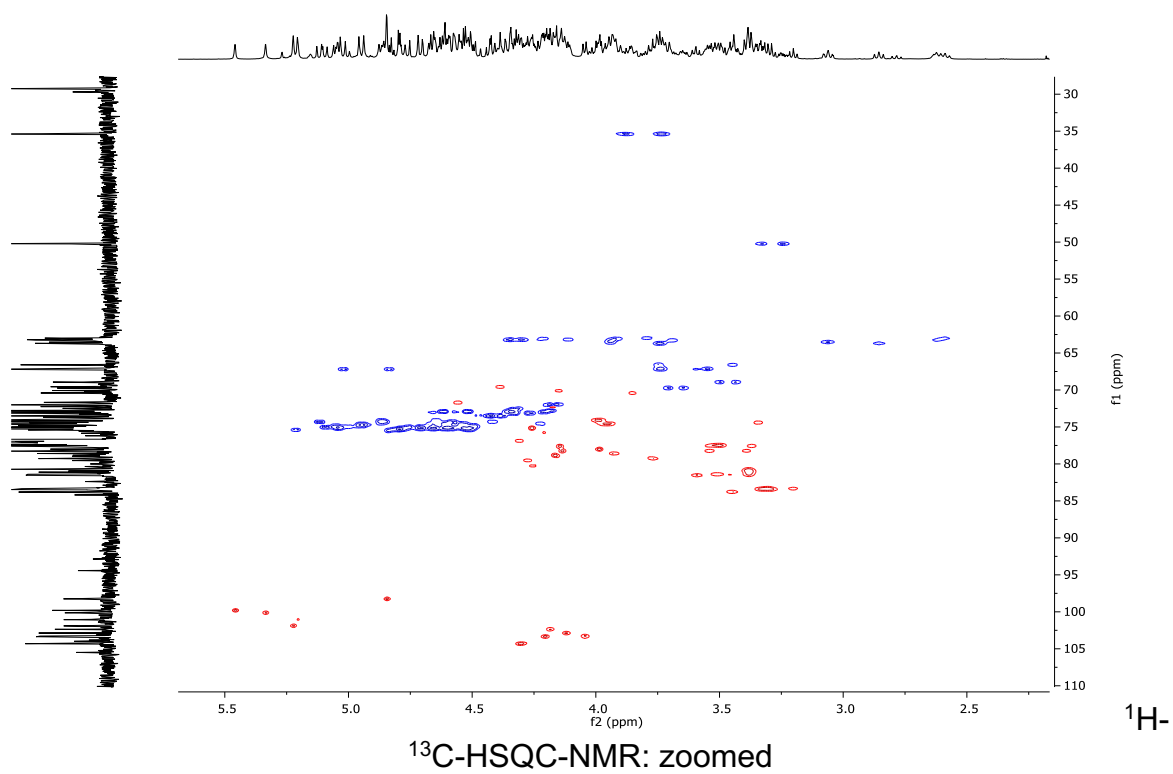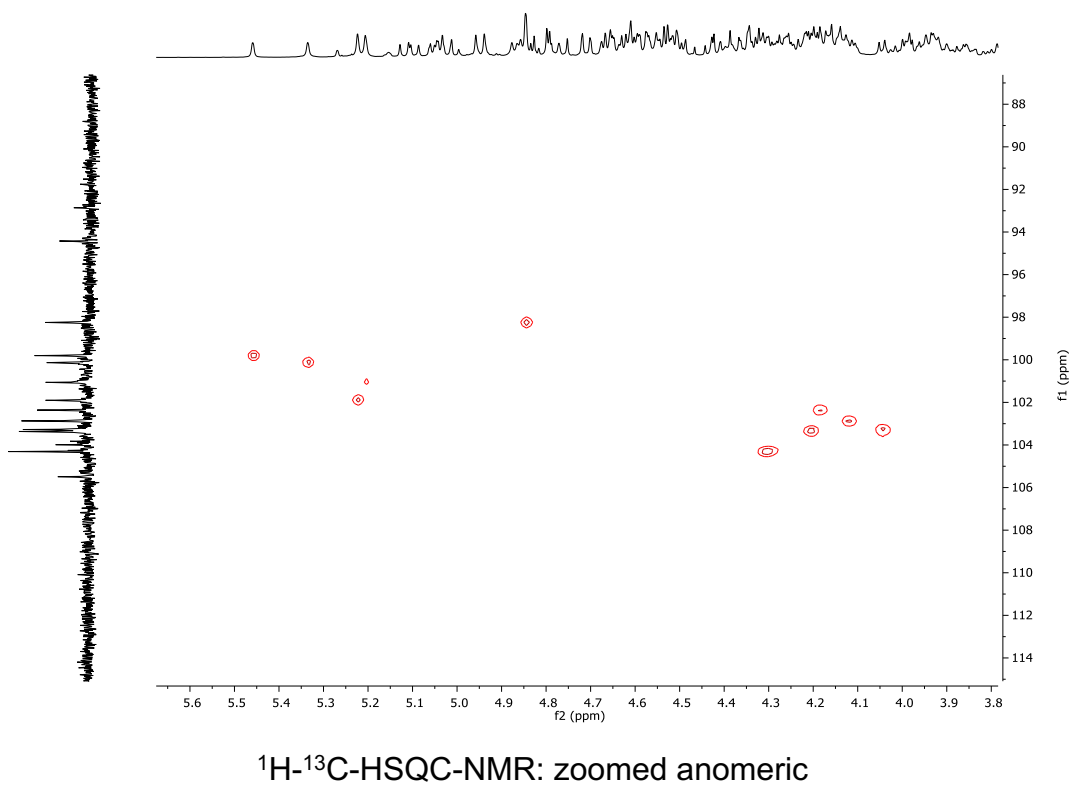







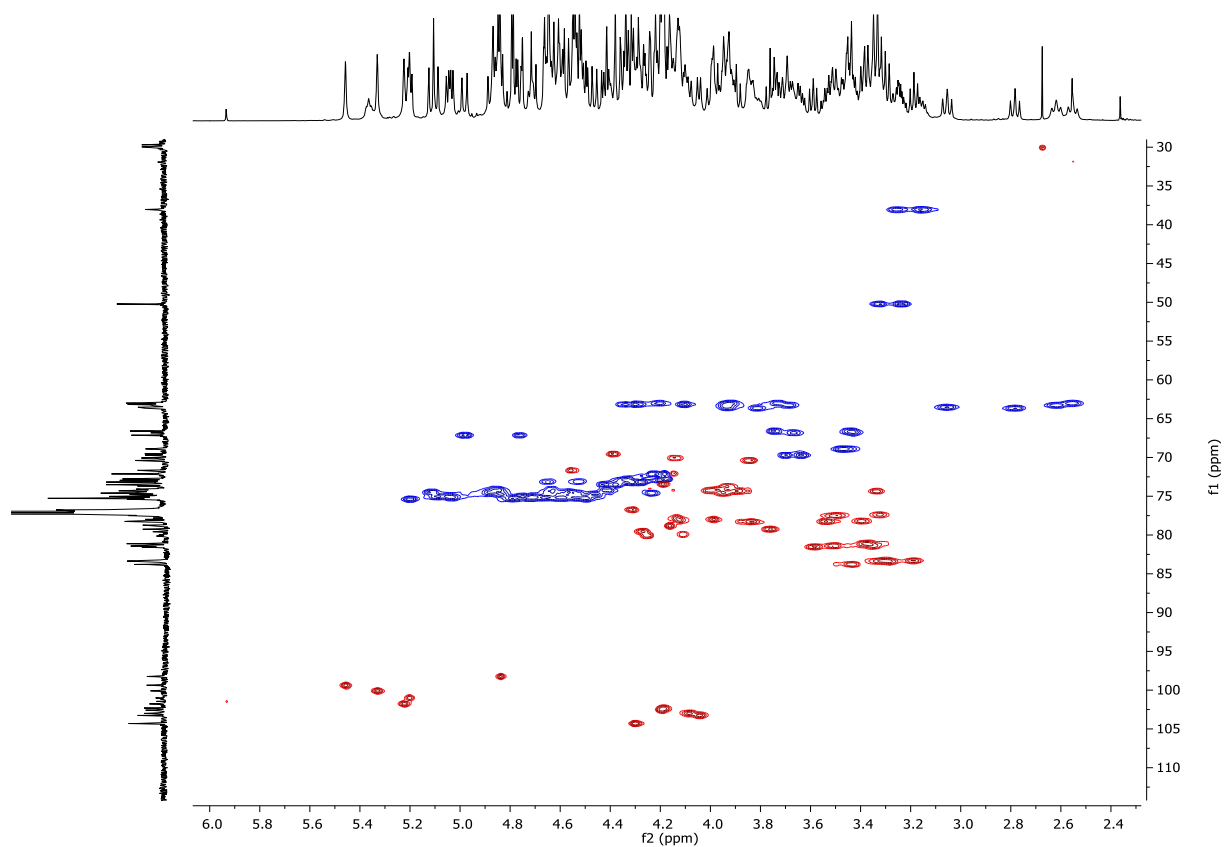

$^1\text{H}$ - $^{13}\text{C}$ -HSQC-NMR: zoomed

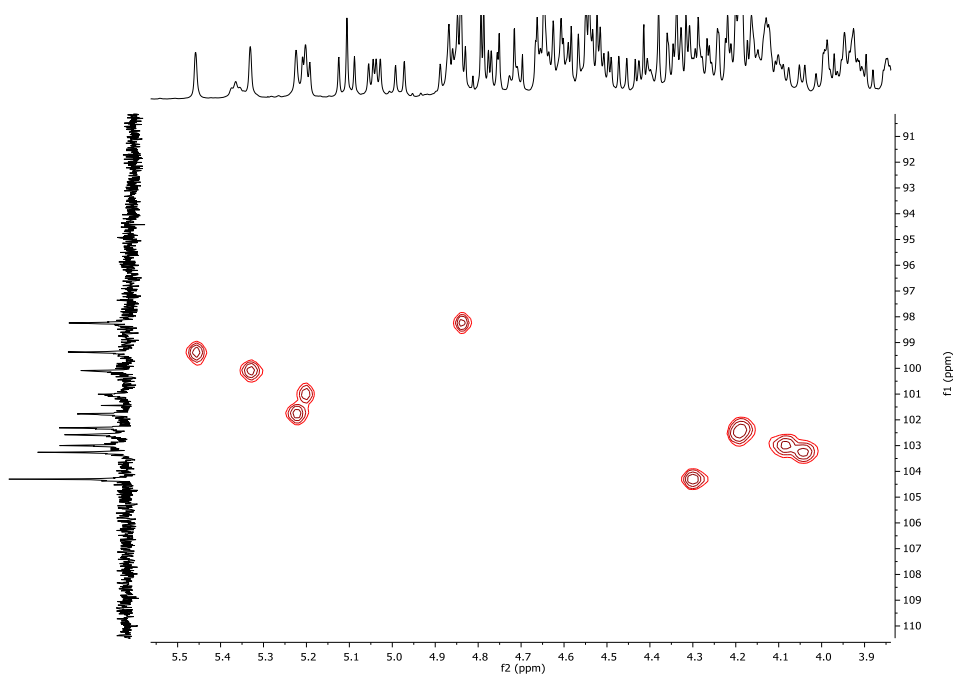

$^1\text{H}$ - $^{13}\text{C}$ -HSQC-NMR: zoomed anomeric



$^1\text{H}$  NMR  $\delta$  [ppm]

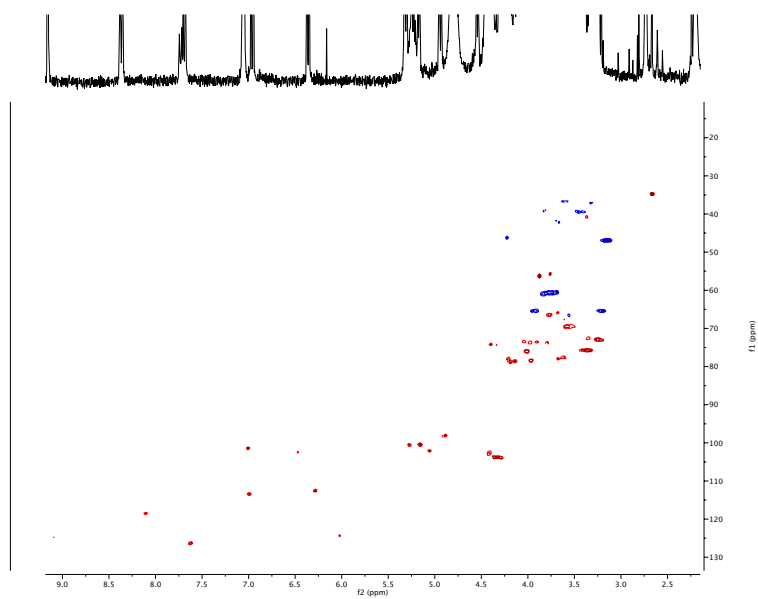

$^1\text{H}$ - $^{13}\text{C}$ -HSQC-NMR

Compound 17

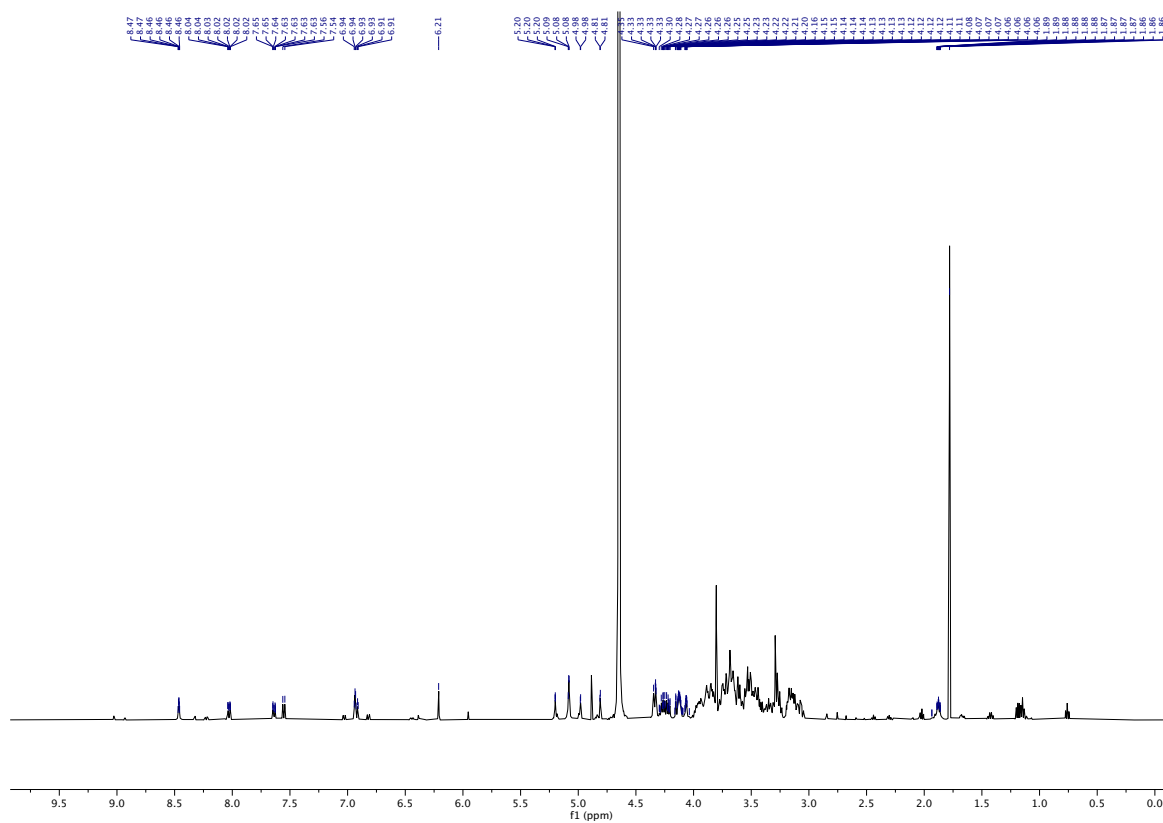

$^1\text{H}$  NMR  $\delta$  [ppm]

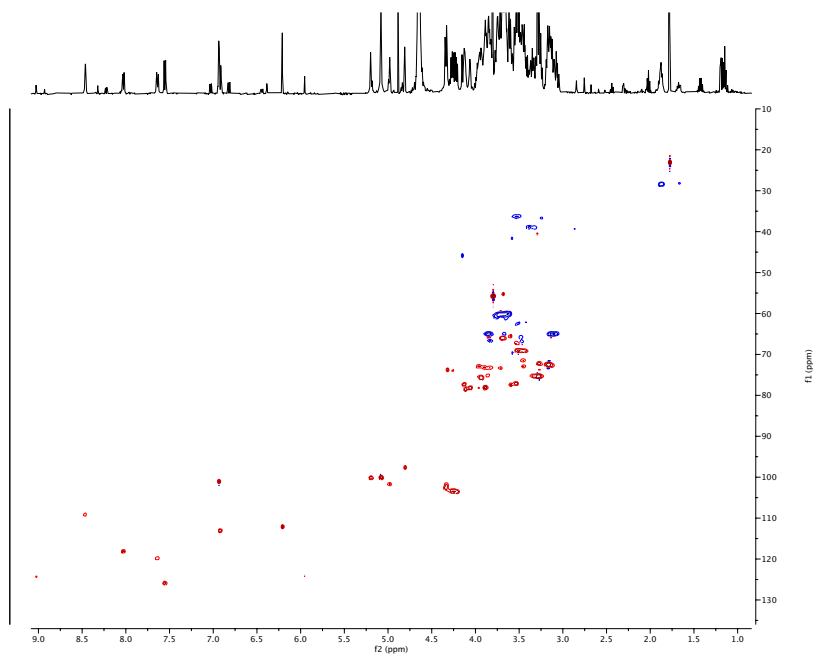

$^1\text{H}$ - $^{13}\text{C}$ -HSQC-NMR

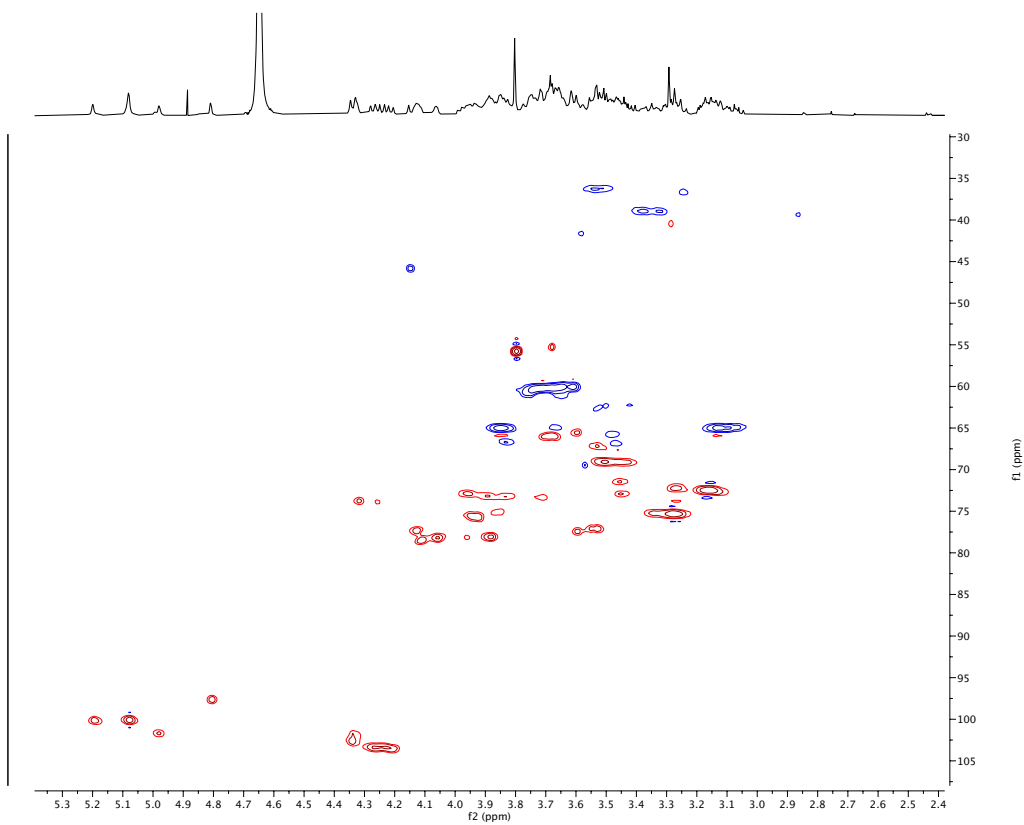

Zoomed 'Glycan Region'  $^1\text{H}$ - $^{13}\text{C}$ -HSQC-NMR

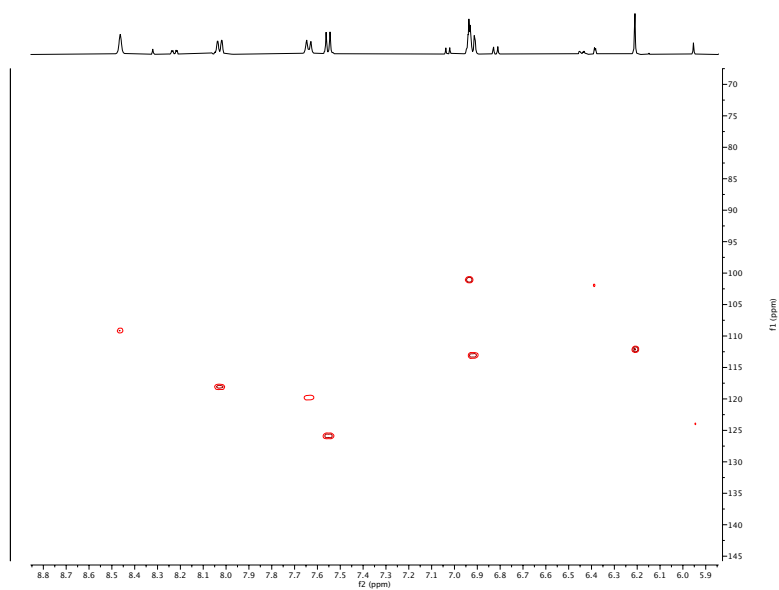

Zoomed 'aromatic'  $^1\text{H}$ - $^{13}\text{C}$ -HSQC-NMR

## Compound 18

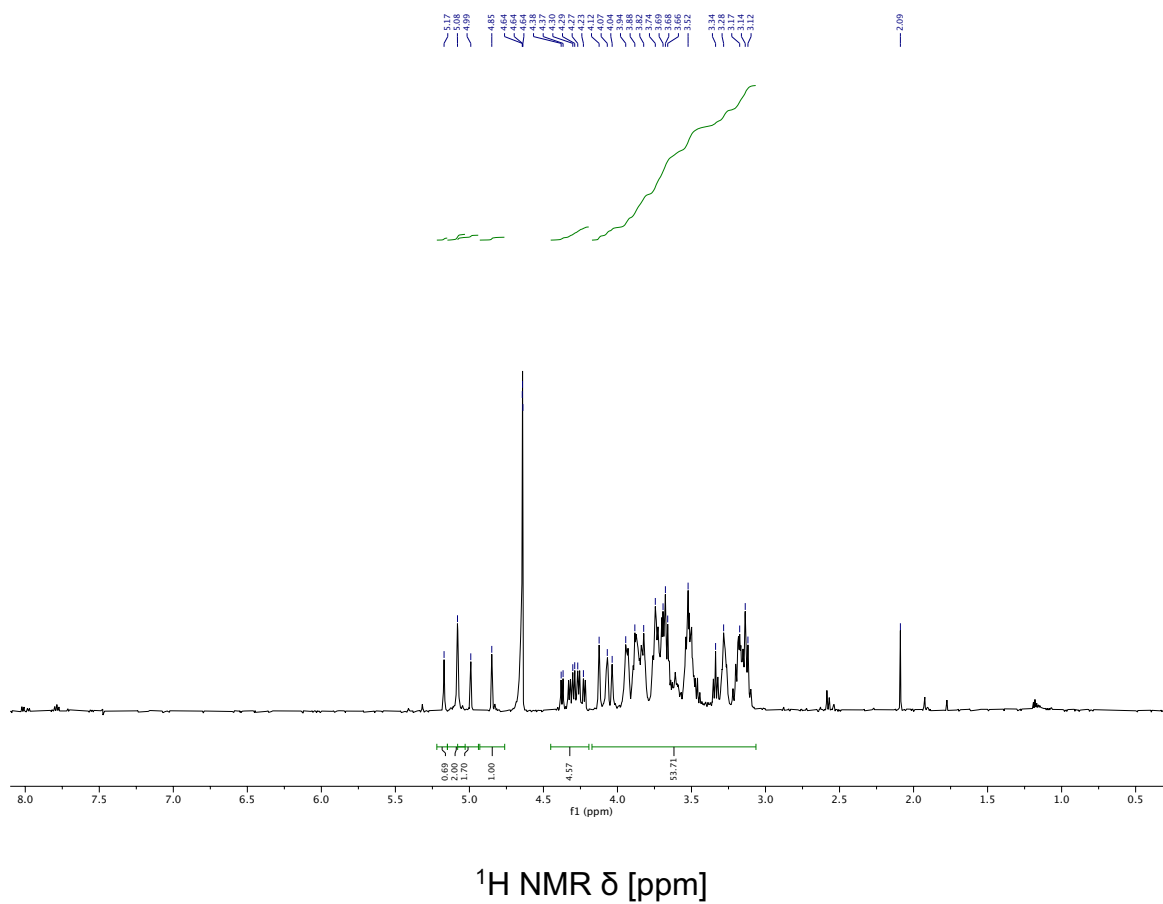

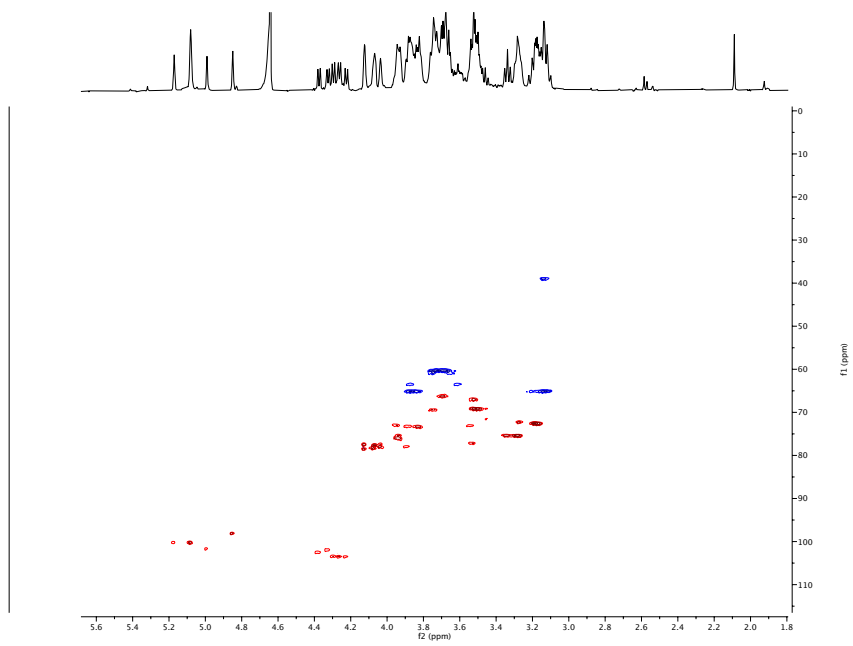

$^1\text{H}$ - $^{13}\text{C}$ -HSQC-NMR
